# 1    **TITLE Disordered clusters of Bak dimers rupture mitochondria during apoptosis**

## 2    **AUTHORS/AFFILIATIONS**

3    Rachel T. Uren<sup>1,2</sup>, Martin O’Hely<sup>1,2,3</sup>, Sweta Iyer<sup>1,2</sup>, Ray Bartolo<sup>1,4</sup>, Jason M. Brouwer<sup>1,2</sup>, Amber E.  
4    Alsop<sup>1,2</sup>, Grant Dewson<sup>1,2</sup>, Ruth M. Kluck\*<sup>1,2</sup>.

5    1. The Walter and Eliza Hall Institute of Medical Research, 1G Royal Parade, Parkville, Victoria,  
6    3052, Australia

7    2. Department of Medical Biology, The University of Melbourne, 1G Royal Parade, Parkville,  
8    Victoria, 3052, Australia

9    3. MOH Current address: Barwon Infant Study, Deakin University, PO Box 218, Geelong, Victoria,  
10    3220, Australia

11    4. RB Current address: Murdoch Children’s Research Institute, The Royal Children’s Hospital,  
12    Flemington Road, Parkville, Victoria, 3052, Australia

## 13    **CONTACT**

14    \* Corresponding author Ruth M. Kluck, The Walter and Eliza Hall Institute of Medical Research,  
15    1G Royal Parade, Parkville, Victoria, 3052, Australia, Tel: +61 3 9345 2487; Fax: +61 3 9347  
16    0852; Email: [kluck@wehi.edu.au](mailto:kluck@wehi.edu.au)

17

## 18 **ABSTRACT**

19 During apoptosis, Bak and Bax undergo major conformational change and form symmetric dimers  
 20 that coalesce to perforate the mitochondrial outer membrane via an unknown mechanism. We have  
 21 employed cysteine labelling and linkage analysis to the full length of Bak in mitochondria. This  
 22 comprehensive survey showed that in each Bak dimer the N-termini are fully solvent-exposed and  
 23 mobile, the core is highly structured, and the C-termini are flexible but restrained by their contact  
 24 with the membrane. Dimer-dimer interactions were more labile than the BH3:groove interaction  
 25 within dimers, suggesting there is no extensive protein interface between dimers. In addition,  
 26 linkage in the mobile Bak N-terminus (V61C) specifically quantified association between dimers,  
 27 allowing mathematical simulations of dimer arrangement. Together, our data show that Bak dimers  
 28 form disordered, compact clusters to generate lipidic pores. These findings provide a molecular  
 29 explanation for the observed structural heterogeneity of the apoptotic pore.

## 30 **INTRODUCTION**

31 The Bcl-2 family of proteins are the principal regulators of apoptotic cell death, with either Bak or Bax  
 32 required to permeabilise the mitochondrial outer membrane (Lindsten et al., 2000, Wei et al., 2001).  
 33 Bak and Bax are triggered to convert to their activated conformation by the binding of BH3-only  
 34 relatives such as Bid and Bim (Gavathiotis et al., 2010, Dai et al., 2011, Du et al., 2011, Czabotar et  
 35 al., 2013, Leshchiner et al., 2013, Brouwer et al., 2014), and once activated can be sequestered by  
 36 pro-survival relatives such as Mcl-1 and Bcl-x<sub>L</sub> (Llambi et al., 2011).

37 The ability of Bak and Bax to change conformation and oligomerize in the mitochondrial outer  
 38 membrane appears crucial for their capacity to perforate this membrane (Westphal et al., 2014).  
 39 Both proteins comprise nine  $\alpha$ -helices that adopt a globular fold in the non-activated state (Suzuki  
 40 et al., 2000, Moldoveanu et al., 2006). Non-activated Bak is anchored in the mitochondrial outer  
 41 membrane via the  $\alpha$ 9-helix forming a transmembrane domain (Iyer et al., 2015). In contrast, non-

42 activated Bax is largely cytosolic due to binding of  $\alpha 9$  to its own hydrophobic groove (Wolter et al.,  
43 1997, Gahl et al., 2014). Following binding of BH3-only proteins, both Bak and Bax undergo  
44 similar conformation changes including  $\alpha 1$  dissociation (Weber et al., 2013, Alsop et al., 2015) and  
45 separation of the “latch” domain ( $\alpha 6$ - $\alpha 8$ ) (Czabotar et al., 2013, Brouwer et al., 2014) from the  
46 “core” domain ( $\alpha 2$ - $\alpha 5$ ). The core and  $\alpha 6$  then collapse onto the membrane surface and become  
47 shallowly inserted into the membrane to lie in-plane (Aluvila, 2014, Bleicken et al., 2014, Westphal  
48 et al., 2014). Symmetric homodimers then form when the exposed BH3 domain of each molecule is  
49 re-buried in the hydrophobic groove of another activated molecule (Dewson et al., 2008, Dewson et  
50 al., 2012, Czabotar et al., 2013, Brouwer et al., 2014). Bax oligomers may also form prior to  
51 membrane insertion (Luo et al., 2014, Sung et al., 2015).

52 How symmetric homodimers of Bak or Bax then associate to porate the mitochondrial outer  
53 membrane is still unknown. Although there is structural information for Bak and Bax homodimers,  
54 no structures of higher order oligomers of Bak or Bax have been resolved. Bak and Bax have been  
55 shown to coalesce into clusters at the mitochondria upon an apoptotic stimulus (Nechushtan et al.,  
56 2001) and small clusters of Bax have been implicated in the rapid release of cytochrome *c* (Zhou  
57 and Chang, 2008). The availability of full-length recombinant Bax makes biochemical assays more  
58 amenable for Bax than for Bak. Thus, Bax complexes of various shapes and sizes have recently  
59 been detected with fluorescence microscopy of recombinant Bax on artificial membranes (Subburaj  
60 et al., 2015). Furthermore, super-resolution microscopy has shown Bax can be found in ring-like  
61 structures, arcs and clusters at the mitochondrial outer membrane of apoptotic cells (Grosse et al.,  
62 2016, Salvador-Gallego et al., 2016), although the orientation of Bax dimers in these structures  
63 could not be visualised. Higher order oligomers of both Bak and Bax vary in size when assessed by  
64 gel filtration, blue native PAGE or linkage (George et al., 2007, Dewson et al., 2012). Moreover,  
65 linkage studies have identified several points at which dimers might associate, including  
66 interactions at  $\alpha$ -helices 1, 3, 5, 6, and 9 (Dewson et al., 2008, Dewson et al., 2009, Zhang et al.,  
67 2010, Pang et al., 2012, Ma et al., 2013, Aluvila, 2014, Bleicken et al., 2014, Gahl et al., 2014, Iyer

et al., 2015, Zhang et al., 2016). Critically, it is not clear whether any of these interaction sites are required for dimer-dimer association and assembly of the apoptotic pore. Here, we compare linkages through the full length of Bak in cells and show that dimers associate in a disordered, lipid-mediated fashion.

## RESULTS

### *The Bak N-segment, $\alpha 1$ and $\alpha 1$ - $\alpha 2$ loop are solvent-exposed in Bak oligomers*

To resolve how Bak dimers coalesce to porate the mitochondrial outer membrane, we sought to generate a more detailed biochemical map of the membrane topology of Bak dimers. This work complemented our previous cysteine-accessibility analyses of Bak  $\alpha 5$ ,  $\alpha 6$  and  $\alpha 9$  (Westphal et al., 2014, Iyer et al., 2015), by analyzing the Bak N-terminus and additional residues in the  $\alpha 2$ - $\alpha 5$  core and C-terminus. The two native cysteine residues of human Bak (C14 and C166) were first substituted with serine to generate Bak Cys null (Bak $\Delta$ Cys, i.e. C14S/C166S), and then a single cysteine residue substituted at several positions throughout the molecule. Each Bak variant was stably expressed in *Bak*<sup>-/-</sup>*Bax*<sup>-/-</sup> mouse embryonic fibroblasts (MEFs) and tested for function (Figure S1). To convert Bak to the activated oligomeric form, membrane fractions enriched for mitochondria were incubated with tBid, as previously (Dewson et al., 2008). To label solvent-exposed cysteine residues, membrane fractions were treated with the thiol-specific labelling reagent IASD (4-acetamido-4'-((iodoacetyl) amino)stilbene-2,2'-disulfonic acid). Two negative sulfonate charges prevent IASD from accessing cysteine in hydrophobic environments (such as the mitochondrial outer membrane or the hydrophobic protein core), and also allow isoelectric focusing (IEF) to resolve IASD-labelled and IASD-unlabelled Bak (Tran et al., 2013, Westphal et al., 2014). We assessed each cysteine-substituted Bak variant for labelling before, during or after incubation with recombinant tBid or tBid<sup>Bax</sup>, a tBid variant containing the Bax BH3 domain (Hockings et al., 2015), that activates Bak analogous to tBid, as well as a control not exposed to IASD and another fully exposed to labelling by denaturation and membrane solubilization (Figure 1A, Figure S2). The



93 approach thus monitors solvent-exposure of the residue as non-activated Bak converts to oligomeric  
94 Bak, and may detect transient exposure during these conformational changes.

95 In the N-terminus, most tested residues were accessible to IASD even before tBid treatment (Figure  
96 1B and S2), consistent with the crystal structure (2IMT) (Moldoveanu et al., 2006). Two residues in  
97  $\alpha 1$  (R36C and Y41C) that were not fully accessible before tBid treatment became exposed  
98 following incubation with tBid (Figures 1B and S2). Two additional  $\alpha 1$  residues, Q44C and Q47C,  
99 also showed a tendency for increased labelling. These changes suggest that the  $\alpha 1$ - $\alpha 2$  loop separates  
100 from  $\alpha 1$ , consistent with increased labelling of A54C in the  $\alpha 1$ - $\alpha 2$  loop that opposes  $\alpha 1$ . Thus,  
101 increased labelling of cysteine residues placed throughout the N-segment,  $\alpha 1$  and the  $\alpha 1$ - $\alpha 2$  loop,  
102 together with exposure of several N-terminal antibody epitopes (Alsop et al., 2015), indicate that  
103 the Bak N-terminus becomes completely solvent-exposed after activation (Figure 1D).

104 To complete our survey of the core and C-termini of Bak dimers (Westphal et al., 2014, Iyer et al.,  
105 2015), we tested the cysteine accessibility of additional selected residues in the  $\alpha 2$ - $\alpha 5$  core and the  
106  $\alpha 7$ - $\alpha 8$  region (Figures 1B and S2). A summary of current and previous cysteine labelling data for  
107 the full length of the Bak protein in Figure 1C provides the following picture of Bak dimer  
108 topology. Certain cysteine residues placed in  $\alpha 2$  became transiently exposed, consistent with  
109 exposure of the BH3 domain and then its burial in the hydrophobic groove in the  $\alpha 2$ - $\alpha 5$  core dimer  
110 (Figure 1C), as predicted by the published structure of the Bak BH3:groove homodimer (4U2V)  
111 (Brouwer et al., 2014). Cysteine substitutions on the exposed surface of  $\alpha 3$  were successfully  
112 labelled with IASD before, during and after tBid treatment. In contrast, two buried residues in  $\alpha 4$   
113 were refractory to IASD labelling throughout. In the  $\alpha 4$ - $\alpha 5$  linker region, although I123C became  
114 more exposed following activation, it was still incompletely labelled. This may reflect loss of  
115 contact between I123C and two hydrophobic residues in the “latch” (I167 and W170), followed by  
116 shallow membrane insertion of I123C as it resides on the hydrophobic face of the Bak dimer core.  
117 Partial labelling of this residue is consistent with shallow membrane insertion as IASD can label

118 cysteine moieties up to 7.5 Å into the hydrocarbon core of a lipid bilayer (Grundling et al., 2000,  
119 Westphal et al., 2014). Within the C-termini, the profile of IASD-labelling was consistent with the  
120 amphipathic α6 helix lying in-plane on the membrane surface (Westphal et al., 2014) and the  
121 hydrophobic α9 forming the sole transmembrane domain (Figure 1D).

122 In summary, Bak undergoes a series of conformational changes as it transitions from its non-  
123 activated monomeric state, to an activated BH3-exposed monomeric intermediate, to the symmetric  
124 dimer that is the building block of the Bak oligomer (Figure 1D). In the course of these structural  
125 rearrangements, some regions of Bak display changes in solvent exposure (such as α1 which  
126 becomes more exposed, or α2 which is transiently exposed) whilst others remain buried throughout  
127 (such as the α9 transmembrane anchor).

# 128 *The N- and C-termini of activated Bak are mobile*

129 Linkage studies have provided significant insight into structural changes in Bak, as well as how the  
130 activated proteins associate into high order oligomers (Dewson et al., 2008, Dewson et al., 2009,  
131 Ma et al., 2013, Aluvila, 2014, Brouwer et al., 2014, Iyer et al., 2015). To directly compare reported  
132 linkages, and to analyse the full length of Bak, we used our expanded library of single-cysteine Bak  
133 variants. Each substituted cysteine was tested for the ability to disulphide bond to the same residue  
134 in a neighbouring Bak molecule (or to a cysteine in a nearby protein) upon addition of the oxidant  
135 copper phenanthroline (CuPhe). Linkage between Bak molecules was indicated by the presence of  
136 2x complexes corresponding to twice the molecular weight of the Bak monomer on non-reducing  
137 SDS-PAGE. It is important to note that these 2x complexes are the product of CuPhe-mediated  
138 linkage between Bak molecules and do not necessarily represent the native Bak BH3:groove dimer  
139 that will form even in the absence of linkage, as shown below on BNP. This system of single  
140 cysteine substitutions offers an elegant screening approach for assessing the proximity of single  
141 cysteine residues in neighbouring molecules in a point-to-point manner, but does not identify

142 interaction surfaces where a single cysteine substitution may not contact its counterpart (See  
143 Discussion).

144 Even in the absence of tBid treatment, cysteine residues in flexible regions displayed some linkage  
145 to neighbouring non-activated Bak molecules (Figure 2, upper panels). For example, some 2x  
146 complexes were captured by cysteine substitutions in the flexible N-segment (G4C, C14, L19C,  
147 S23C), and  $\alpha 1$ - $\alpha 2$  loop (G51C, D57C, P58C, Q66C, S68C, S69C), indicating some proximity of  
148 Bak monomers in untreated mitochondria. Furthermore, disulphide linkage to proteins other than  
149 Bak resulted in Bak complexes larger than the 2x species and was observed for cysteine  
150 substitutions in the  $\alpha 2$ - $\alpha 3$  helices (D84C, R87C),  $\alpha 4$ - $\alpha 5$  loop (S121C, N124C),  $\alpha 8$ - $\alpha 9$  linker  
151 (G186C, I188C) and C-terminal end of  $\alpha 9$  (V205C). This is unsurprising as the MOM is a protein-  
152 rich environment and there are documented examples of monomeric Bak associating with other  
153 membrane proteins such as VDAC2 (Cheng et al., 2003, Lazarou et al., 2010, Ma et al., 2014).

154 After addition of tBid had activated Bak, each cysteine in the N-extremity (a region comprising the  
155 N-terminus,  $\alpha 1$  and  $\alpha 1$ - $\alpha 2$  loop) showed more efficient linkage to 2x complexes (Figure 2A, upper  
156 panel). The freedom with which each cysteine in the N-extremity of Bak can link suggests this  
157 region is highly mobile and does not engage in stable protein-protein or protein-lipid interactions  
158 following activation. In contrast, cysteine residues positioned in the core ( $\alpha 2$ - $\alpha 5$ ) showed relatively  
159 modest linkage to 2x complexes (Figure 2B, upper panel), consistent with lack of flexibility in the  
160  $\alpha 2$ - $\alpha 5$  core dimer (Brouwer et al., 2014) and its relative immobility due to association with the  
161 membrane.

162 We next addressed linkage in the C-extremity encompassing the  $\alpha 6$ - $\alpha 8$  latch and  $\alpha 9$  transmembrane  
163 domain (Figure 2C, upper panel). After Bak activation, H164C in  $\alpha 6$  showed increased linkage to  
164 2x complexes, as reported previously (Dewson et al., 2009, Ma et al., 2013). Cysteine substitutions  
165 in the  $\alpha 8$ - $\alpha 9$  loop and the beginning of the  $\alpha 9$  transmembrane domain (up to residue N190C) also  
166 showed linkage to 2x complexes (Figure 2C, upper panel). However, compared to the N-extremity,

linkage was less complete, possibly due to membrane association limiting mobility. Linkage of membrane-buried  $\alpha 9$  residues was even less efficient (Figure 2C). However, at a higher temperature  $\alpha 9$  residues show much stronger linkage (Figure S3) (Iyer et al., 2015), attributable to increased Bak mobility or CuPhe penetration into the bilayer.

In summary, after Bak activation, the whole N-extremity is highly dynamic due to being fully solvent-exposed; the core is constrained and membrane-associated; and the C-extremity is flexible, but is anchored to the membrane.

#### ***Mobility of the N- and C-extremities permits linkage between dimers***

We next used blue native PAGE (BNP) to consider two types of cysteine-mediated Bak linkage: linkage *within* Bak dimers and linkage *between* Bak dimers. The Bak BH3:groove interaction *within* dimers is an extensive protein-protein interface and is stable in 1% digitonin on BNP while the interaction between dimers is not (Ma et al., 2013). Thus oligomerized Bak migrates only as BH3:groove dimers on BNP. Addition of CuPhe to mitochondrial extracts prior to BNP can stabilise high order complexes on BNP and does so by cysteine-mediated linkage *between* dimers (Ma et al., 2013). Thus, if addition of CuPhe at the end of the mitochondrial incubation generated 4x and greater complexes on BNP, we conclude that the linkage was *between* dimers. If larger complexes were absent and dimers predominated on BNP, any linkage was *within* the dimer. Thus, parallel examination of CuPhe linked Bak species on BNP and non-reducing SDS PAGE permits differentiation of three conditions: linkage *within* the dimer, linkage *between* dimers, or no cysteine linkage (Figure 3A).

In the N-extremity (G4C to S69C), each introduced cysteine could link some dimers to larger complexes on BNP (Figure 2A, lower panel). Upon tBid activation, SDS-PAGE showed an increased proportion of 2x complexes, and higher order complexes (>10x) were observed on BNP for all residues. Of note was a stretch of residues from E59 to T62 that, following tBid treatment,

191 exhibited very efficient linkage by SDS-PAGE (obvious 2x, negligible 1x). In this stretch, BNP  
 192 showed no dimer species and a concomitant shift to 4x species and higher order complexes,  
 193 indicating efficient linkage between dimers but no linkage within dimers. Residues closer to the  $\alpha$ 2-  
 194  $\alpha$ 5 core (Q66C to S69C), showed progressively more 1x species (SDS-PAGE) and an increase in  
 195 dimers (BNP), indicative of becoming closer to the constrained core of the dimer. Together, these  
 196 linkage data further argue that dimers possess flexible N-extremities capable of efficient linkage  
 197 within and between dimers, with linkage becoming exclusively between dimers as residues  
 198 approach the constrained  $\alpha$ 2- $\alpha$ 5 core (Figure 3B). Interestingly, because linkage of cysteine residues  
 199 in the E59-T62 region occurs *only* between dimers, and is very efficient, this linkage provides a  
 200 molecular sensor that can specifically quantitate dimer-dimer interactions, and is the first assay to  
 201 do so.

202 In the Bak C-terminus also, cysteines could link dimers to larger complexes on BNP, although a  
 203 striking laddering pattern was apparent (Figure 2C, lower panels). For example, the large (>10x)  
 204 complexes common at the highly mobile N-extremity were not apparent at the membrane-  
 205 associated C-extremity. Stronger ladders for certain residues may be explained by the membrane  
 206 associated  $\alpha$ 6- $\alpha$ 8 allowing only certain residues to be presented laterally. Lastly, linkage in the C-  
 207 extremity may be only between dimers (rather than within dimers) as the proportion of 2x to 1x  
 208 species on SDS-PAGE is similar to the proportion of high order complexes to dimers on BNP.

### 209 *Single-cysteine mutants in the rigid core capture some linkage, mostly at the lateral edges*

210 Previous studies suggested that the structured  $\alpha$ 2- $\alpha$ 5 core of the Bak (or Bax) dimer might form a  
 211 dominant, symmetric interface capable of driving dimers to form higher order complexes (Aluvila,  
 212 2014, Brouwer et al., 2014). For example, crystals of the Bak  $\alpha$ 2- $\alpha$ 5 core dimer showed a side-by-  
 213 side association (4U2V)(Brouwer et al., 2014). However, this was attributed to crystal packing  
 214 effects, as chemical crosslinking between the  $\alpha$ 4- $\alpha$ 5 loops was not detected (Brouwer et al., 2014).  
 215 Accordingly, in the present studies, disulphide bonding between the  $\alpha$ 4- $\alpha$ 5 loops was not captured

216 with CuPhe (Figure 2B, lower). End-to-end associations were suggested by  $\alpha 3:\alpha 3'$  or  $\alpha 5:\alpha 5'$   
 217 linkages (Aluvila, 2014, Brouwer et al., 2014), and disulphide bonding at the equivalent residues  
 218 was also evident in this study (H99C:H99C for  $\alpha 3:\alpha 3'$ ; H145C:H145C' for  $\alpha 5:\alpha 5'$ )(Figure 2B,  
 219 lower). Notably, this linkage was not as efficient as linkage observed for the N-extremity, and these  
 220 and other linkage-competent residues locate mostly to the lateral edges of the  $\alpha 2-\alpha 5$  core dimer  
 221 when lying in-plane (Figure 3C). Thus, screening individual cysteine substitutions in the Bak dimer  
 222 core for linkage did not uncover any dominant sites of interaction between Bak dimers, but showed  
 223 widespread linkage of residues around the lateral edges of the dimer, consistent with the random  
 224 collision of Bak dimers.

225 These findings support a flexible extremity model for full-length Bak dimers in the MOM, outlined  
 226 in Figure 3D with side-on (left) and top-down views (right). At the centre is the  $\alpha 2-\alpha 5$  core dimer  
 227 lying in-plane and partially submerged in the membrane surface. Extending from both sides of the  
 228 core dimer is a flexible latch ( $\alpha 6-\alpha 8$ ) of ~50 residues that also lies in-plane and connects to the  
 229 transmembrane  $\alpha 9$ -helices. Extending from both ends of the dimer core is the solvent-exposed,  
 230 flexible and mobile N-extremity of ~70 residues. Each circle in Figure 3D illustrates the range of  
 231 possible positions for the flexible N- and C-extremities (blue and pink respectively). Overlap of the  
 232 largest blue circles (labelled G4C) indicates the potential for residues close to the N-terminus to link  
 233 within dimers. In contrast, the smaller blue circles (labelled V61C) do not overlap, indicating a lack  
 234 of linkage within the dimer at this residue. Notably, these linkage constraints are consistent with the  
 235 dimensions of the  $\alpha 2-\alpha 5$  dimer core as determined from the recent crystal structure (4U2V) (Figure  
 236 3E).

237 These findings also reveal how dimers associate into high order oligomers. As linkage can be  
 238 induced between several regions of the Bak dimer, there is no dominant protein-protein interface  
 239 that mediates dimer assembly into high order oligomers. Rather, the linkage pattern is consistent  
 240 with transient collision of dimers in-plane on the membrane. Collisions of the  $\alpha 2-\alpha 5$  core and  $\alpha 6-\alpha 8$

latch are limited by their membrane-association, whereas the flexible, entirely solvent-exposed N-terminal region is free to link between dimers and does so very efficiently.

### ***Inter-dimer interfaces are more labile to detergent than the intra-dimer (BH3:groove) interface***

We next examined if the inter-dimer interactions identified above were stable in digitonin, as shown for the BH3:groove interface within dimers (Ma et al., 2013). Digitonin was added to the mitochondrial incubations after Bak had become oligomerized by incubation with tBid, but prior to disulphide bond formation induced by CuPhe (Figure 4A). As expected, digitonin did not prevent linkage *within* dimers as shown by 2x complexes of M71C/K113C on SDS-PAGE (Figure 4A, upper panel, lane 3). However, digitonin prevented all linkage *between* dimers on BNP of seven single-cysteine variants (Figure 4A, lower panel), indicating that inter-dimer interactions are mediated either by membrane or by weak protein-protein interactions.

These experiments also provided new insight into linkage within dimers. For example, two residues at the far N- and C-termini (L19C and the C-terminal extension GGSGGCK (Iyer et al., 2015)) could link within dimers to generate 2x complexes on SDS-PAGE after digitonin treatment (Figure 4A, upper panel). Thus, these residues were sufficiently distal from the core to reach their counterpart across the length of the structured  $\alpha 2$ - $\alpha 5$  core dimer and allow linkage within the dimer (Figure 3D, 3E). On BNP, dimers of these two residues (L19C, and to a lesser extent GGSGGCK) also migrated faster than dimers of other variants (Figure 4A, lower panel), suggesting that linkage within the dimer caused a more compact, faster migrating protein complex under these native conditions.

### ***Bak dimers can become interspersed by Bax***

To test if interactions between Bak dimers could be disrupted by other proteins, and thus test if Bak dimer aggregation was a dynamic, reversible process, we added recombinant proteins from the Bcl-2 protein family after Bak had formed dimers (Figure 4B). Dimer interactions were monitored by



linkage between the N-termini (V61C:V61C') or C-termini (H164C:H164C'), and compared to BH3:groove linkage (M71C:K113C). To oligomerize Bak, mitochondria were first incubated with tBid<sup>M97A</sup>, a variant that binds poorly to prosurvival proteins such as Bcl-x<sub>L</sub> and Mcl-1 (Lee et al., 2016). Mitochondria were then incubated with recombinant Bax, Bcl-x<sub>L</sub> or Mcl-1ΔNΔC. Finally, CuPhe was applied and the extent of disulphide linkage assessed by non-reducing SDS-PAGE (Figure 4B). Notably, Bax translocated to mitochondria and decreased linkage between Bak dimers (e.g. V61C:V61C' and of H164C:H164C') but not within dimers (e.g. M71C:K113C) (Figure 4B). In contrast, recombinant Bcl-x<sub>L</sub> and Mcl-1ΔNΔC translocated to the mitochondrial membrane but did not interfere with linkage between Bak dimers (Figure 4B). Thus, Bax not only localised to the same membrane microdomain as the pre-formed Bak oligomers, but became partially interspersed with the dimers, indicating that dimer aggregation is dynamic.

### *V61C:V61C' linkage can monitor dimer-dimer interactions; stochastic simulations reveal a disordered aggregate of Bak dimers*

Our biochemical data support the random collision of Bak dimers at the mitochondrial outer membrane during apoptosis. Indeed, several studies indicate that Bax and Bak can reside in a variety of different structures at the mitochondrial outer membrane of apoptotic cells, including clusters (Nechushtan et al., 2001, Zhou and Chang, 2008, Grosse et al., 2016, Nasu et al., 2016, Salvador-Gallego et al., 2016). To test if random collisions between dimers could feasibly explain the linkage patterns observed, simulations of the random contact between dimers were performed. The efficient and exclusive linkage that occurs between dimers at residue V61C formed the basis of our simulations (Figure 5).

To simulate the aggregation of Bak dimers on the mitochondrial outer membrane, this complex biological system was simplified to limit the number of parameters required to mimic the experimental outcome. We simulated the membrane as a flat surface (i.e. a 2D plane). Each subunit representing a Bak dimer, was evenly distributed on a geometric grid imposed on this surface



(Figure 6A), and to avoid edge effects the grid was wrapped onto a torus. A hexagonal grid, rather than square or triangular, was selected to best represent the close packing of objects on a plane with the greatest degrees of freedom. The linkage potential of each subunit in the grid was based on the known linkage constraints of the V61C residue; i.e. linkage occurred exclusively and efficiently between dimers and each dimer could make at most 2 cysteine linkages, but possibly only 1 or 0 linkages if no other free cysteines were available. Furthermore, the simulation allowed linkages only between immediately adjacent dimers, based on the short 4 Å limit of the CuPhe-mediated disulphide linkage and the known dimensions of the Bak dimer. Thus, each hexagonal subunit had the freedom to link with at most two neighbouring hexagons, in any direction, and this random linkage between neighbouring dimers would result in a mixture of linkage states including double, single or no linkages. With this hexagonal grid, four types of double linkage were possible; opposite, obtuse, acute or reciprocal (Figure 6B). An equal probability for each of the double linkages (opposite, obtuse, acute or reciprocal) was imposed, to reflect close but random packing of dimers at the membrane. Furthermore, the simulation was allowed to proceed to complete linkage of available cysteine residues, to reflect the near-complete linkage of V61C:V61C'. With these few parameters, a complex biological system was elegantly reduced to a simplified simulation.

The simulation output was a frequency distribution of the number of Bak dimers present in each linked complex (Figure S4). To approximate the BNP western blot densitometry, the counts were then multiplied by the number of Bak dimer units (e.g. 1, 2, 3, 4 etc) in each of the linked Bak complexes, and the predicted densitometry smoothed with a gaussian kernel to allow qualitative comparison with the gaussian-like densitometry output from the BNP western blots.

Notably, the simulation produced outputs that closely matched the distinctive linkage pattern observed for V61C, i.e. prominent 4x complexes and complexes greater than 10x the Bak molecular weight (compare Figure 5A, 5B with Figure 6C, 6D). Thus, the simulations provided proof of principle that the linkage pattern (V61C:V61C') observed in mitochondria can be explained by

random dimer arrangement. These logic arguments based on the linkage constraints of the V61C residue have, for the first time, afforded single molecule resolution of Bak aggregation.

### *Simulations are robust to a reduction in linkage*

To explore robustness of the simulations, we asked if the simulation could predict the linkage pattern when linkage was limited due either to less V61C residues, or to cysteine residues at positions other than V61C. In the first test, we performed mitochondrial experiments in which ~50% of the Bak molecules lacked cysteine residues. In those experiments, Bak V61C was co-expressed with Bak Cys-null that was FLAG-tagged (Figure S5A, upper panel). As expected, only half of the Bak molecules could link to 2x species after activation by tBid and induction of linkage (Figure S5A, middle panel, lane 4). In addition, all molecules formed BH3:groove dimers after incubation with tBid, as shown by BNP, but the capture of higher order oligomers mediated by cysteine-linkage was greatly reduced (Figure S5A, lower panel, lane 4; quantified in Figure S5B). In simulations of this system, we assumed equal expression of V61C and the Cys null variants, as indicated by western blot analysis. We also assumed that this population of monomers forms dimers in Mendelian proportions: 25% of dimers are V61C doublets and can link twice, 50% are V61C:Cys null and can link once, and the remaining 25% are Cys null doublets and cannot link (Figure S5C). The simulation output (Figure S5D) reflected that of the BNP densitometry (Figure S5B) in terms of more dimers and fewer >10x complexes, indicating the simulation was generalizable to a different distribution of linkage-competent Bak molecules.

We next examined if our simulations were also robust when approximating the linkage pattern of residues other than V61C (Figure S6A). As noted above, because T62C, Q66C, S68C, and S69C substitutions were closer than V61C to the constrained  $\alpha 2$ - $\alpha 5$  core, they did not link efficiently (Figure 2A lower, quantified in Figure S6B). To simulate this steric hindrance caused by a shorter distance from the constrained core, an *edge blocking* effect was introduced to the model; every edge of every hexagon was prohibited from having a link form across it with this probability for the

duration of each simulation. As the edge blocking probability increased from 0 to 0.75, linkage between dimers decreased to generate patterns comparable to BNP analysis of these core-proximal residues (Figure S6C). Thus, modification of a single parameter could describe linkage of residues closer than V61C to the Bak dimer core. The adaptability of this simple simulation further illustrated the strength and feasibility of our model of random Bak dimer aggregation at the mitochondrial outer membrane during apoptosis.

## DISCUSSION

Here we investigated the topology of Bak dimers in the mitochondrial outer membrane, and how dimers assemble into the high order oligomers thought necessary to form apoptotic pores in that membrane. We found that Bak dimers are characterized by flexible N- and C-extremities flanking a rigid  $\alpha 2$ - $\alpha 5$  core, and that these dimers aggregate in disordered, dynamic, compact clusters. Critically, we found no evidence for a single, dominant protein-protein interface between dimers and predict the lipid environment plays a crucial role in facilitating the aggregation of dimers and subsequent membrane rupture.

We had previously proposed the in-plane model for Bak dimers (Westphal et al., 2014). Our current data advances this model to show the N- and C-extremities are flexible, based on analysis of the full-length of Bak when activated and dimerised at the mitochondrial outer membrane (Figure 3D). The N-extremity (~70 residues C-terminal to  $\alpha 2$ ) becomes fully solvent-exposed as shown by IASD labelling, and fully mobile as indicated by linkage, consistent with exposure of N-terminal cleavage sites and antibody epitopes in  $\alpha 1$  and the  $\alpha 1$ - $\alpha 2$  loop (Griffiths et al., 1999, Weber et al., 2013, Alsop et al., 2015). Failure of the N-extremity to re-engage in protein-protein or protein-lipid interactions argues that it does not contribute to the assembly of dimers. The remainder of Bak is membrane-associated, with the  $\alpha 2$ - $\alpha 5$  core and  $\alpha 6$  (and possibly  $\alpha 7$ - $\alpha 8$ ) in-plane with the outer mitochondrial membrane surface and partially embedded (Aluvila, 2014, Brouwer et al., 2014, Westphal et al., 2014) while  $\alpha 9$  forms a transmembrane domain (Iyer et al., 2015). The topology of

the  $\alpha 2$ - $\alpha 5$  region is consistent with the  $\alpha 2$ - $\alpha 5$  core dimer crystal structure ( $\sim 35\text{\AA} \times 45\text{\AA}$ ) (Brouwer et al., 2014), as V61C ( $\sim 30\text{\AA}$  from the core dimer) linked between dimers but not within dimers. Flexibility of the C-terminal  $\alpha 6$ - $\alpha 9$  region, as indicated by multiple linkages between these regions (Bleicken et al., 2014, Iyer et al., 2015, Zhang et al., 2016), implies that embedded dimers adopt a range of conformations on the MOM surface (Figure 7A).

Linkage experiments have identified several possible interactions between dimers of Bak or Bax (Dewson et al., 2008, Dewson et al., 2009, Zhang et al., 2010, Pang et al., 2012, Ma et al., 2013, Aluvila, 2014, Bleicken et al., 2014, Gahl et al., 2014, Iyer et al., 2015, Zhang et al., 2016), with many also shown in the present study. Notably, however, a dominant protein-protein interface between dimers was not evident. Rather, linkage between the membrane-associated regions could be detected at many positions, arguing for a disordered arrangement. As our single-cysteine scanning approach can only examine the homotypic pairing of cysteine residues, it remains possible that heterotypic pairing of cysteine substitutions may detect a more complex protein interface between dimers, as seen for near complete linkage at the Bak BH3:groove interface (M71C:K113C, Figure 4B) (Dewson et al., 2008). However, in support of the notion that there is no dominant protein interface between dimers, the interaction between Bak dimers is lost when digitonin is added, in contrast to the BH3:groove interface which persists in the presence of digitonin. Moreover, lability of dimer-dimer association was highlighted by the capacity of Bax to intermingle with pre-formed Bak dimers. Each of Bcl<sub>XL</sub>, Mcl-1 and Bax localised to mitochondria with similar efficiency, however a critical feature of Bax is that, like Bak, following activation by tBid it collapses onto the membrane surface to form homodimers (Westphal et al., 2014). The large membrane surface occupied by Bax dimers, together with disturbance of the outer leaflet, may explain why Bax, but not the prosurvival proteins, could disrupt Bak dimer-dimer association in this assay.

389 A variety of biophysical and imaging techniques have been deployed to better understand how Bak  
390 (or Bax) dimers associate, yet it remains unclear. Well-characterised pore-forming proteins  
391 typically reveal an extensive interface between subunits that facilitates pore formation (Song et al.,  
392 1996, Mueller et al., 2009). Versions of this regular architecture have recently been considered for  
393 Bak and Bax as a closed circuit of dimers lining a circular pore (Aluvila, 2014, Bleicken et al.,  
394 2014, Brouwer et al., 2014). In contrast to these hypothetical linear dimer arrangements, our  
395 biochemical data revealed that there is no single dominant interface between the  $\alpha 2$ - $\alpha 5$  core dimers  
396 and support the random collision of Bak dimers in two dimensions at the mitochondrial outer  
397 membrane during apoptosis. Here a novel approach of mathematical modelling was used to  
398 simulate linkage between Bak dimers and showed the feasibility of random dimer association. For  
399 example, as the V61C residue linked only between Bak dimers, and did so very efficiently, this  
400 provided a powerful tool for testing different arrangements of Bak dimers on the membrane. A  
401 minimalist set of assumptions were adopted for stochastic simulations of V61C:V61C' linkage  
402 between Bak dimers: linkage is complete and irreversible but occurs only between dimers; only two  
403 linkages are possible per dimer; and neighbouring dimers can only link if both have a free cysteine  
404 available for disulphide bonding. Indeed, the simulation showed good concordance with different  
405 sets of linkage data obtained from fully oligomerised Bak in mitochondria. From this we conclude  
406 that Bak dimers are closely packed and aggregate with a random orientation. As pores no longer  
407 form if Bak levels decrease by ~50% in these cells (Ferrer et al., 2012), our observations from this  
408 whole population of Bak represent the species of Bak dimers that contribute to pore formation,  
409 rather than a minor species not involved in pore formation.

410 A disordered cluster of dimers is reminiscent of the "carpet" model of pore formation by peptides  
411 (reviewed by (Gilbert, 2016)). Amphipathic antimicrobial peptides such as melittin lie parallel to  
412 the membrane plane, with accumulation causing strain in the outer layer of the membrane until at  
413 higher concentrations the lamellar structure of the membrane is destabilised and non-lamellar  
414 lipidic pores are formed (Lee et al., 2008, Lee et al., 2013). Like an amphipathic peptide, the Bak

415 and Bax  $\alpha 2$ - $\alpha 5$  core dimers and  $\alpha 6$ -helices penetrate the outer leaflet of the bilayer (Czabotar et al.,  
 416 2013, Aluvila, 2014, Brouwer et al., 2014, Westphal et al., 2014). While very high concentrations  
 417 of antimicrobial peptides can disintegrate membrane in a detergent-like manner, this does not  
 418 appear to occur with near- physiological levels of Bak and Bax (Lee et al., 2008). Antimicrobial  
 419 peptides also have membrane thinning attributes (Chen et al., 2003), as reported for Bax (Satsoura  
 420 et al., 2012). Satsoura and colleagues discuss how membrane deformation by Bax may promote  
 421 oligomerization mediated not by protein:protein interactions but by long-range changes in  
 422 membrane tension (Satsoura et al., 2012). Thus, as illustrated in Figure 7B, we hypothesize that Bak  
 423 dimers penetrate the outer leaflet to attract further dimers and in doing so increase the membrane  
 424 disturbance. Enlarging clusters then destabilize the membrane sufficiently to form lipidic pores that  
 425 release apoptogenic factors. The pores may then be stabilized by parts of the Bak and Bax dimers  
 426 rearranging to line the pore and form proteolipidic pores (Terrones et al., 2004, Garcia-Saez, 2012,  
 427 Westphal et al., 2014). Hence, our model for the disordered clustering of Bak dimers provides a  
 428 holistic molecular explanation for the detection of Bak and Bax in a variety of formations including  
 429 complete rings, arcs, lines and random clusters (Grosse et al., 2016, Nasu et al., 2016, Salvador-  
 430 Gallego et al., 2016).

431 In conclusion, this study proposes a novel means of oligomerization by Bak and Bax in apoptotic  
 432 cells: that dimers aggregate in dense clusters without a dominant interface and this dynamic  
 433 association requires the involvement of the lipid membrane. We have described molecular tools that  
 434 can precisely monitor the aggregation of Bak dimers in cells, and could also be used to examine  
 435 how the pro-survival proteins inhibit Bak oligomerisation, which may impact on the development  
 436 of cancer therapies that target these proteins. Critically, the combination of linkage data and  
 437 mathematical simulations described here has offered, for the first time, insight into assembly of the  
 438 apoptotic pore with single molecule resolution.

439

## 440 MATERIALS AND METHODS

### 441 Recombinant proteins

442 Recombinant proteins were prepared as previously described; caspase 8-cleaved human Bid (tBid)  
 443 (as per (Kluck et al., 1999)), tBid<sup>Bax</sup> and Bcl-x<sub>L</sub> full length (as per (Hockings et al., 2015)), Cys null  
 444 Bax full length (as per (Czabotar et al., 2013)), Mcl-1ΔN151ΔC23 (as per (Chen et al., 2005)).  
 445 tBid<sup>M97A</sup> was kindly provided by E. Lee (Lee et al., 2016).

### 446 Bak variant library cloning and expression

447 A library of human Bak mutants was generated by site-directed cysteine substitution (as per  
 448 (Dewson et al., 2008). Human Bak with the endogenous cysteine residues mutated to serine (Bak  
 449 Cys null C14S/C166S) was used as the template in overlap extension PCR to introduce single  
 450 cysteine residues throughout the Bak sequence, and then cloned into the pMX-IRES-GFP retroviral  
 451 vector (primer and vector sequences available on request). Mutants were introduced into SV40-  
 452 immortalized *Bak*<sup>-/-</sup>*Bax*<sup>-/-</sup> mouse embryonic fibroblasts (MEFs) by retroviral infection (as per  
 453 (Dewson et al., 2008)).

### 454 Preparation of membrane fractions enriched for mitochondria

455 *Bak*<sup>-/-</sup>*Bax*<sup>-/-</sup> MEFs expressing Bak cysteine mutants were permeabilised and membrane fractions  
 456 containing the mitochondria were isolated as previously described (Dewson et al., 2008). Cells were  
 457 washed in PBS and then re-suspended at a concentration of  $1 \times 10^7$  cells/ml in wash buffer  
 458 supplemented with digitonin (100 mM sucrose, 20 mM HEPES-NaOH pH 7.5, 100 mM KCl, 2.5  
 459 mM MgCl<sub>2</sub>, 4 μg/ml Pepstatin A (Sigma-Aldrich, St. Louis, MO, USA), Complete protease  
 460 inhibitors (Roche, Castle Hill, NSW, Australia) and 0.025% w/v digitonin (Calbiochem, Merck,  
 461 Darmstadt, Germany). Cells were incubated for 10 min on ice, then membrane fractions were  
 462 collected by centrifugation at 16,000 ×g for 5 min and the supernatant discarded. Pellets were re-



463 suspended in wash buffer (no digitonin), and permeabilisation of the cell membrane confirmed by  
464 trypan blue uptake.

## 465 **Activation of Bak by tBid or Etoposide**

466 To assess the apoptotic function of each Bak variant in cells, *Bak<sup>-/-</sup>Bax<sup>-/-</sup>* MEFs expressing Bak  
467 cysteine mutants were treated with etoposide (10  $\mu$ M) for 24 h, and cell death, as indicated by  
468 propidium iodide (5  $\mu$ g/ml) uptake, determined by flow cytometry (FACSCalibur, BD Biosciences,  
469 San Jose, CA, USA). To activate Bak and induce mitochondrial outer membrane permeabilisation  
470 *in vitro*, membrane fractions from *Bak<sup>-/-</sup>Bax<sup>-/-</sup>* MEFs expressing Bak cysteine variants were treated  
471 with 100 nM recombinant tBid for 30 min at 30°C (as described in (Dewson et al., 2008). Selected  
472 samples were treated with the functionally equivalent protein tBid<sup>Bax</sup> in which the BH3 domain of  
473 Bid was substituted with the Bax BH3 domain (Hockings et al., 2015).

## 474 **Cysteine accessibility to IASD labelling, one-dimensional isoelectric focussing and IASD** 475 **quantification**

476 The cysteine residue of each Bak variant was assessed for solvent exposure by incubating  
477 membrane fractions with the cysteine-labelling reagent IASD (Molecular Probes® Life  
478 Technologies, Carlsbad, CA, USA) for 30 min at 30°C (as described in (Westphal et al., 2014)).  
479 Membrane fractions were supplemented with 100  $\mu$ M TCEP to prevent oxidization of cysteines that  
480 would inhibit IASD labelling. Samples were unlabelled, or incubated with IASD before, during or  
481 after tBid incubation or following denaturation with 1% w/v ASB-16 (Merck). IASD labelling was  
482 quenched by the addition of 200 mM DTT and samples solubilised in 1% ASB-16 for 10 min at  
483 22°C. Soluble supernatant fractions were isolated by centrifugation at 16,000  $\times$ g for 5 min, and  
484 added to an equal volume of IEF sample buffer (7 M urea, 2 M thiourea, 2% w/v CHAPS,  
485 Complete protease inhibitors, 4  $\mu$ g/ml pepstatin A, 1% w/v ASB-16 and 0.04% w/v bromophenol  
486 blue). Samples were loaded onto 12-well Novex® pH 3-7 IEF gels (Life Technologies) and focused



487 with a Consort EV265 power supply with increasing voltage (100 V for 1 h, 200 V for 1 h and 500  
488 V for 30 min). IEF gels were pre-soaked in SDS buffer (75 mM Tris/HCl, pH 6.8, 0.6% w/v SDS,  
489 15% v/v glycerol), and then transferred to PVDF membrane for western blot analysis.

490 IASD labelling was quantified (ImageLab 4.1, Bio-RAD) from western blots by measuring signal  
491 intensity for the unlabelled and labelled Bak band species in each lane to calculate the percentage of  
492 the total signal from each lane attributed to the faster migrating IASD-labelled species. A global  
493 background subtraction was applied to regions of interest from each western blot. Data were  
494 presented as the mean  $\pm$  SD ( $n \geq 3$ ), or range ( $n = 2$ ) and the number of replicates indicated on the  $x$ -  
495 axis. A two-tailed unpaired t-test was employed to determine significant differences ( $p < 0.05$ ) in the  
496 percentage of IASD labelled Bak before versus after tBid treatment.

#### 497 **Oxidant-induced disulphide linkage (CuPhe)**

498 The cysteine residue of each Bak variant was tested for disulphide linkage with proximal cysteine  
499 residues on Bak (or other proteins) by incubation with the oxidant copper phenanthroline (CuPhe)  
500 (as per (Dewson et al., 2008)). CuPhe was prepared as a stock solution of 30 mM CuSO<sub>4</sub> and 100  
501 mM 1,10-phenanthroline in 4:1 water/ethanol. Following incubation of membrane fractions with  
502 tBid at 30 °C, samples were pre-chilled on ice for 5 min, and then incubated with a 100-fold  
503 dilution of the CuPhe solution on ice for 15 min. Note that (Iyer et al., 2015) performed CuPhe  
504 linkage without the pre-chill incubation. Disulphide bond formation (linkage) was quenched by the  
505 addition of 20 mM N-ethyl maleimide (NEM, to label any remaining free cysteines, 10 min on ice)  
506 and 5 mM EDTA (to chelate copper, 5 min on ice) and samples analysed by non-reducing SDS  
507 PAGE or blue native PAGE (BNP).

#### 508 **SDS PAGE and Blue Native PAGE**

509 CuPhe-linked samples were analysed by SDS PAGE (12% TGX gels (Life Technologies)) in the  
510 absence of reducing agents to preserve disulphide bonds. The efficiency of linkage between Bak

511 molecules was measured by a shift in Bak migration from 1x to 2x complexes. To discriminate  
 512 between linkages occurring within or between Bak dimers, CuPhe-linked samples were also  
 513 analysed in tandem by blue native PAGE (BNP) to preserve the native dimer interface (i.e. the  
 514 BH3:groove interface) in addition to any disulphide bonds between Bak molecules. Migration of  
 515 higher order linked complexes (i.e. greater than dimer) on BNP indicated the presence of disulphide  
 516 bonds between Bak dimers. Following quenching of CuPhe with NEM and EDTA, membrane  
 517 fractions were isolated by centrifugation at 16,000  $\times g$  for 5 min. Supernatants were discarded and  
 518 membrane pellets were solubilised in 20 mM Bis-Tris pH 7.4, 50 mM NaCl, 10% v/v glycerol, 1%  
 519 w/v digitonin, and incubated on ice for 1 h and insoluble material was removed by centrifugation at  
 520 16,000  $\times g$  for 5 min. The resulting supernatants were prepared for BNP by the addition of Native  
 521 Sample buffer (Life Technologies) and Coomassie Additive (Life Technologies), and then loaded  
 522 onto Novex® 4-16% Native PAGE 1.0 mm 10 well gels as per the manufacturer's instructions (Life  
 523 Technologies). Western blot transfer to PVDF was performed at 30 V for 150 min in transfer buffer  
 524 (25 mM Tris, 192 mM Glycine, 20% v/v Methanol) supplemented with 0.037 % w/v SDS. PVDF  
 525 membranes were de-stained with 10% v/v acetic acid 30% v/v ethanol, then further de-stained in  
 526 methanol and rinsed thoroughly with dH<sub>2</sub>O before immunoblotting.

## 527 **Immunoblotting**

528 SDS PAGE and IEF membranes were immunoblotted for Bak using the rabbit polyclonal anti-Bak  
 529 aa23-38 (B5897, Sigma-Aldrich, Castle Hill, NSW, Australia). BNP membranes were  
 530 immunoblotted for Bak using an in-house anti-Bak monoclonal rat IgG (clone 7D10, WEHI,  
 531 (Dewson et al., 2009, Alsop et al., 2015)), except in the case of Bak mutants ranging from G51C to  
 532 P58C that were detected on BNP with the anti-Bak aa23-38. In-house monoclonal rat antibodies  
 533 were used to detect recombinant Bax (clone 49-F9, WEHI), Bcl-x<sub>L</sub> (clone 9C9, WEHI) and Mcl-1  
 534 (clone 19C 4-15, WEHI). Horseradish peroxidase conjugated IgG secondary antibodies were used;  
 535 anti-rabbit (4010-05, Southern Biotech) and anti-rat (3010-05, Southern Biotech). Immobilised

536 horseradish peroxidase was detected with Luminata Forte western HRP substrate (WBLUF0500,  
537 Millipore, Billerica, MA, USA), images captured with the ChemiDoc XRS+ System (Bio-RAD,  
538 Hercules, CA, USA) and signal intensity measured with Image Lab 4.1 software (Bio-RAD).

### 539 **Blue Native PAGE densitometry**

540 Images were transformed in Image Lab 4.1 (Bio-RAD) to correct any rotation of the image and  
541 exported as .tif for densitometry in FIJI (ImageJ 1.47n) (Schindelin et al., 2012, Schneider et al.,  
542 2012). The lookup table (LUT) was inverted and images rotated 90 degrees. Using the rectangular  
543 selection tool, a box was drawn around the lane of interest to encompass the full range of Bak signal  
544 (with fixed dimensions of 370 x 50 pixels). This box was then measured with the Dynamic ROI  
545 profiler plugin. Plot values were exported for analysis in Prism (ver 6.0f, Graphpad Software Co.,  
546 La Jolla, CA, USA), and normalised to a fraction of the total intensity for each lane of interest. A  
547 clearer representation of multiple replicate plots of lane intensity was achieved by a linear rescaling  
548 of each replicate's horizontal axis so that the maximum corresponding to Bak 4x species, and the  
549 characteristic minimum (which is a highly reproducible artefact of our Bak BNP western blots) at  
550 ~720 kDa, coincided across replicates.

### 551 **Simulation of linkage between dimers (V61C:V61C')**

552 The formation of a disulphide linked oligomer is modelled by repeatedly (a) selecting an available  
553 pair of cysteines on neighbouring dimers at random, (b) declaring them linked and (c) removing  
554 those cysteines from the list of those subsequently available. We continue until no neighbouring  
555 dimers have cysteines available for linkage, to reflect complete linkage of V61C:V61C'. We  
556 consider a collection of Bak dimers on a two-dimensional surface (see Figure 6). Dimers are  
557 arranged on a hexagonal grid, and linkage is permitted in all directions. Each dimer has two  
558 cysteines available for disulphide linkage to a neighbouring dimer. We simulate such that linkage is  
559 allowed in all directions with equal probability. Reduced linkage efficiency was modelled by

560 introducing an edge blocking effect. Every edge between neighbouring hexagonal cells was flagged  
561 as eligible for a disulphide bond, independently at random with probability  $p$  constant across all  
562 edges in a given simulation, for  $p=0, 0.25, 0.5$  and  $0.75$ . We modelled the experimental scenario  
563 where Bak dimers were formed from a mixture of equal amounts of V61C and cys-null monomers  
564 by assigning each dimer either zero, one or two available cysteines with probability  $0.25, 0.5$  and  
565  $0.25$  respectively (see Figure S5C).

566 Predicted densitometry for each Bak dimer multiplicity are presented by taking the distribution of  
567 oligomer sizes on completion of the simulation, multiplying by the number of Bak dimers in each  
568 oligomer to obtain the theoretical density that would give rise to in the western blot, using an  
569 exponential horizontal axis to mimic the nonlinear spacing of bands, and applying a gaussian kernel  
570 estimator to approximate the smearing of bands and their running into one another at higher  
571 molecular weights (see Figure S4).

## 572 AUTHOR CONTRIBUTIONS

573 Conceptualization, RTU, GD, RMK; Methodology, RTU, MOH, SI, GD, RMK; Software, MOH;  
574 Investigation, RTU, SI, RB, JMB, AEA, GD; Formal analysis, RTU, MOH; Data curation, MOH;  
575 Visualization, RTU, MOH, SI, RMK; Writing – Original Draft, RTU, RMK; Writing – Review &  
576 Editing, RTU, MOH, SI, AEA, GD, RMK; Supervision, RTU, RMK

## 577 ACKNOWLEDGMENTS

578 The authors declare no conflict of interest. We thank Peter Colman, Peter Czabotar, John Markham,  
579 Matthew Ritchie, Aline Oelgeklaus and Melissa Shi for critical comments on the manuscript. We  
580 thank Colin Hockings for helpful discussions regarding simulations. We gratefully acknowledge the  
581 IASD labelling assay development and analysis methods of Dana Westphal. Our work is supported  
582 by NHMRC grants (637337 and 1016701), and the Victorian State Government Operational  
583 Infrastructure Support and the Australian Government NHMRC IRISS.

## 584 REFERENCES

- 585 ALSOP, A. E., FENNELL, S. C., BARTOLO, R. C., TAN, I. K., DEWSON, G. & KLUCK, R. M.  
586 2015. Dissociation of Bak alpha1 helix from the core and latch domains is required for  
587 apoptosis. *Nat Commun*, 6, 6841.
- 588 ALUVILA, S. M., T. HUSTEDT, E. FAJER, P. CHOE, JY. OH, KJ. 2014. Organization of the  
589 mitochondrial apoptotic BAK pore: oligomerization of the Bak homodimers. *J Biol Chem*,  
590 289, 2537-51.
- 591 BLEICKEN, S., JESCHKE, G., STEGMUELLER, C., SALVADOR-GALLEGO, R., GARCIA-  
592 SAEZ, A. J. & BORDIGNON, E. 2014. Structural model of active bax at the membrane.  
593 *Mol Cell*, 56, 496-505.
- 594 BROUWER, J. M., WESTPHAL, D., DEWSON, G., ROBIN, A. Y., UREN, R. T., BARTOLO, R.,  
595 THOMPSON, G. V., COLMAN, P. M., KLUCK, R. M. & CZABOTAR, P. E. 2014. Bak  
596 Core and Latch Domains Separate during Activation, and Freed Core Domains Form  
597 Symmetric Homodimers. *Mol Cell*, 55, 938-46.
- 598 CHEN, F. Y., LEE, M. T. & HUANG, H. W. 2003. Evidence for membrane thinning effect as the  
599 mechanism for peptide-induced pore formation. *Biophys J*, 84, 3751-8.
- 600 CHEN, L., WILLIS, S. N., WEI, A., SMITH, B. J., FLETCHER, J. I., HINDS, M. G., COLMAN,  
601 P. M., DAY, C. L., ADAMS, J. M. & HUANG, D. C. 2005. Differential targeting of  
602 prosurvival Bcl-2 proteins by their BH3-only ligands allows complementary apoptotic  
603 function. *Molecular Cell*, 17, 393-403.
- 604 CHENG, E. H., SHEIKO, T. V., FISHER, J. K., CRAIGEN, W. J. & KORSMEYER, S. J. 2003.  
605 VDAC2 inhibits BAK activation and mitochondrial apoptosis. *Science*, 301, 513-517.
- 606 CZABOTAR, P. E., WESTPHAL, D., DEWSON, G., MA, S., HOCKINGS, C., FAIRLIE, W. D.,  
607 LEE, E. F., YAO, S., ROBIN, A. Y., SMITH, B. J., HUANG, D. C., KLUCK, R. M.,  
608 ADAMS, J. M. & COLMAN, P. M. 2013. Bax Crystal Structures Reveal How BH3  
609 Domains Activate Bax and Nucleate Its Oligomerization to Induce Apoptosis. *Cell*, 152,  
610 519-31.
- 611 DAI, H., SMITH, A., MENG, X. W., SCHNEIDER, P. A., PANG, Y. P. & KAUFMANN, S. H.  
612 2011. Transient binding of an activator BH3 domain to the Bak BH3-binding groove  
613 initiates Bak oligomerization. *J Cell Biol*, 194, 39-48.
- 614 DEWSON, G., KRATINA, T., CZABOTAR, P., DAY, C. L., ADAMS, J. M. & KLUCK, R. M.  
615 2009. Bak activation for apoptosis involves oligomerization of dimers via their alpha6  
616 helices. *Mol Cell*, 36, 696-703.
- 617 DEWSON, G., KRATINA, T., SIM, H. W., PUTHALAKATH, H., ADAMS, J. M., COLMAN, P.  
618 M. & KLUCK, R. M. 2008. To trigger apoptosis Bak exposes its BH3 domain and homo-  
619 dimerizes via BH3:groove interactions. *Mol Cell*, 30, 369-380.
- 620 DEWSON, G., MA, S., FREDERICK, P., HOCKINGS, C., TAN, I., KRATINA, T. & KLUCK, R.  
621 M. 2012. Bax dimerizes via a symmetric BH3:groove interface during apoptosis. *Cell Death*  
622 *Differ*, 19, 661-70.
- 623 DU, H., WOLF, J., SCHAFER, B., MOLDOVEANU, T., CHIPUK, J. E. & KUWANA, T. 2011.  
624 BH3 domains other than Bim and Bid can directly activate Bax/Bak. *J Biol Chem*, 286, 491-  
625 501.
- 626 FERRER, P. E., FREDERICK, P., GULBIS, J. M., DEWSON, G. & KLUCK, R. M. 2012.  
627 Translocation of a Bak C-terminus mutant from cytosol to mitochondria to mediate  
628 cytochrome C release: implications for Bak and Bax apoptotic function. *PLoS One*, 7,  
629 e31510.
- 630 GAHL, R. F., HE, Y., YU, S. & TJANDRA, N. 2014. Conformational rearrangements in the pro-  
631 apoptotic protein, Bax, as it inserts into mitochondria: a cellular death switch. *J Biol Chem*,  
632 289, 32871-82.
- 633 GARCIA-SAEZ, A. J. 2012. The secrets of the Bcl-2 family. *Cell Death Differ*, 19, 1733-40.

- 634 GAVATHIOTIS, E., REYNA, D. E., DAVIS, M. L., BIRD, G. H. & WALENSKY, L. D. 2010.  
635 BH3-Triggered Structural Reorganization Drives the Activation of Proapoptotic BAX.  
636 *Molecular Cell*, 40, 481-92.
- 637 GEORGE, N. M., EVANS, J. J. & LUO, X. 2007. A three-helix homo-oligomerization domain  
638 containing BH3 and BH1 is responsible for the apoptotic activity of Bax. *Genes Dev*, 21,  
639 1937-1948.
- 640 GILBERT, R. J. 2016. Protein-lipid interactions and non-lamellar lipidic structures in membrane  
641 pore formation and membrane fusion. *Biochim Biophys Acta*, 1858, 487-99.
- 642 GRIFFITHS, G. J., DUBREZ, L., MORGAN, C. P., JONES, N. A., WHITEHOUSE, J., CORFE,  
643 B. M., DIVE, C. & HICKMAN, J. A. 1999. Cell damage-induced conformational changes  
644 of the pro-apoptotic protein Bak in vivo precede the onset of apoptosis. *Journal of Cell*  
645 *Biology*, 144, 903-914.
- 646 GROSSE, L., WURM, C. A., BRUSER, C., NEUMANN, D., JANS, D. C. & JAKOBS, S. 2016.  
647 Bax assembles into large ring-like structures remodeling the mitochondrial outer membrane  
648 in apoptosis. *EMBO J*, 35, 402-13.
- 649 GRUNDLING, A., BLASI, U. & YOUNG, R. 2000. Biochemical and genetic evidence for three  
650 transmembrane domains in the class I holin, lambda S. *J Biol Chem*, 275, 769-76.
- 651 HOCKINGS, C., ANWARI, K., NINNIS, R. L., BROUWER, J., O'HELY, M., EVANGELISTA,  
652 M., HINDS, M. G., CZABOTAR, P. E., LEE, E. F., FAIRLIE, W. D., DEWSON, G. &  
653 KLUCK, R. M. 2015. Bid chimeras indicate that most BH3-only proteins can directly  
654 activate Bak and Bax, and show no preference for Bak versus Bax. *Cell Death Dis*, 6,  
655 e1735.
- 656 IYER, S., BELL, F., WESTPHAL, D., ANWARI, K., GULBIS, J., SMITH, B. J., DEWSON, G. &  
657 KLUCK, R. M. 2015. Bak apoptotic pores involve a flexible C-terminal region and  
658 juxtaposition of the C-terminal transmembrane domains. *Cell Death Differ*.
- 659 KLUCK, R. M., ESPOSTI, M. D., PERKINS, G., RENKEN, C., KUWANA, T., BOSSY-  
660 WETZEL, E., GOLDBERG, M., ALLEN, T., BARBER, M. J., GREEN, D. R. &  
661 NEWMAYER, D. D. 1999. The pro-apoptotic proteins, Bid and Bax, cause a limited  
662 permeabilization of the mitochondrial outer membrane that is enhanced by cytosol. *J Cell*  
663 *Biol*, 147, 809-22.
- 664 LAZAROU, M., STOJANOVSKI, D., FRAZIER, A. E., KOTEVSKI, A., DEWSON, G.,  
665 CRAIGEN, W. J., KLUCK, R. M., VAUX, D. L. & RYAN, M. T. 2010. Inhibition of Bak  
666 activation by VDAC2 is dependent on the Bak transmembrane anchor. *J Biol Chem*, 285,  
667 36876-83.
- 668 LEE, E. F., GRABOW, S., CHAPPAZ, S., DEWSON, G., HOCKINGS, C., KLUCK, R. M.,  
669 GRAY, D. H., WITKOWSKI, M. T., EVANGELISTA, M., PETTIKIRIARACHCHI, A.,  
670 BOUILLET, P., CORY, S., VANDENBERG, C. J., LANE, R. M., CZABOTAR, P. E.,  
671 COLMAN, P. M., SMITH, B. J., KILE, B. T. & FAIRLIE, W. D. 2016. Physiological  
672 restraint of Bak by Bcl-xL is essential for cell survival. *Genes Dev*, In press.
- 673 LEE, M. T., HUNG, W. C., CHEN, F. Y. & HUANG, H. W. 2008. Mechanism and kinetics of pore  
674 formation in membranes by water-soluble amphipathic peptides. *Proc Natl Acad Sci U S A*,  
675 105, 5087-92.
- 676 LEE, M. T., SUN, T. L., HUNG, W. C. & HUANG, H. W. 2013. Process of inducing pores in  
677 membranes by melittin. *Proc Natl Acad Sci U S A*, 110, 14243-8.
- 678 LESHCHINER, E. S., BRAUN, C. R., BIRD, G. H. & WALENSKY, L. D. 2013. Direct activation  
679 of full-length proapoptotic BAK. *Proc Natl Acad Sci U S A*, 110, E986-95.
- 680 LINDSTEN, T., ROSS, A. J., KING, A., ZONG, W., RATHMELL, J. C., SHIELDS, H. A.,  
681 ULRICH, E., WAYMIRE, K. G., MAHAR, P., FRAUWIRTH, K., CHEN, Y., WEI, M.,  
682 ENG, V. M., ADELMAN, D. M., SIMON, M. C., MA, A., GOLDEN, J. A., EVAN, G.,  
683 KORSMEYER, S. J., MACGREGOR, G. R. & THOMPSON, C. B. 2000. The combined  
684 functions of proapoptotic Bcl-2 family members Bak and Bax are essential for normal  
685 development of multiple tissues. *Mol Cell*, 6, 1389-1399.



LLAMBI, F., MOLDOVEANU, T., TAIT, S. W., BOUCHIER-HAYES, L., TEMIROV, J.,  
MCCORMICK, L. L., DILLON, C. P. & GREEN, D. R. 2011. A unified model of  
mammalian BCL-2 protein family interactions at the mitochondria. *Mol Cell*, 44, 517-31.

LUO, L., YANG, J. & LIU, D. 2014. Integration and oligomerization of Bax protein in lipid  
bilayers characterized by single molecule fluorescence study. *J Biol Chem*, 289, 31708-18.

MA, S., HOCKINGS, C., ANWARI, K., KRATINA, T., FENNELL, S., LAZAROU, M., RYAN,  
M. T., KLUCK, R. M. & DEWSON, G. 2013. Assembly of the Bak apoptotic pore: a  
critical role for the Bak protein alpha6 helix in the multimerization of homodimers during  
apoptosis. *J Biol Chem*, 288, 26027-38.

MA, S. B., NGUYEN, T. N., TAN, I., NINNIS, R., IYER, S., STROUD, D. A., MENARD, M.,  
KLUCK, R. M., RYAN, M. T. & DEWSON, G. 2014. Bax targets mitochondria by distinct  
mechanisms before or during apoptotic cell death: a requirement for VDAC2 or Bak for  
efficient Bax apoptotic function. *Cell Death Differ*.

MOLDOVEANU, T., LIU, Q., TOCILJ, A., WATSON, M. H., SHORE, G. & GEHRING, K. 2006.  
The x-ray structure of a BAK homodimer reveals an inhibitory zinc binding site. *Molecular  
Cell*, 24, 677-688.

MUELLER, M., GRAUSCHOPF, U., MAIER, T., GLOCKSHUBER, R. & BAN, N. 2009. The  
structure of a cytolytic alpha-helical toxin pore reveals its assembly mechanism. *Nature*,  
459, 726-30.

NASU, Y., BENKE, A., ARAKAWA, S., YOSHIDA, G. J., KAWAMURA, G., MANLEY, S.,  
SHIMIZU, S. & OZAWA, T. 2016. In Situ Characterization of Bak Clusters Responsible  
for Cell Death Using Single Molecule Localization Microscopy. *Sci Rep*, 6, 27505.

NECHUSHTAN, A., SMITH, C. L., LAMENSDORF, I., YOON, S. H. & YOULE, R. J. 2001. Bax  
and Bak coalesce into novel mitochondria-associated clusters during apoptosis. *Journal of  
Cell Biology*, 153, 1265-1276.

PANG, Y. P., DAI, H., SMITH, A., MENG, X. W., SCHNEIDER, P. A. & KAUFMANN, S. H.  
2012. Bak Conformational Changes Induced by Ligand Binding: Insight into BH3 Domain  
Binding and Bak Homo-Oligomerization. *Sci Rep*, 2, 257.

SALVADOR-GALLEGU, R., MUND, M., COSENTINO, K., SCHNEIDER, J., UNSAY, J.,  
SCHRAERMAYER, U., ENGELHARDT, J., RIES, J. & GARCIA-SAEZ, A. J. 2016. Bax  
assembly into rings and arcs in apoptotic mitochondria is linked to membrane pores. *EMBO  
J*, 35, 389-401.

SATSOURA, D., KUCERKA, N., SHIVAKUMAR, S., PENCER, J., GRIFFITHS, C., LEBER, B.,  
ANDREWS, D. W., KATSARAS, J. & FRADIN, C. 2012. Interaction of the full-length  
Bax protein with biomimetic mitochondrial liposomes: a small-angle neutron scattering and  
fluorescence study. *Biochim Biophys Acta*, 1818, 384-401.

SCHINDELIN, J., ARGANDA-CARRERAS, I., FRISE, E., KAYNIG, V., LONGAIR, M.,  
PIETZSCH, T., PREIBISCH, S., RUEDEN, C., SAALFELD, S., SCHMID, B., TINEVEZ,  
J. Y., WHITE, D. J., HARTENSTEIN, V., ELICEIRI, K., TOMANCAK, P. & CARDONA,  
A. 2012. Fiji: an open-source platform for biological-image analysis. *Nat Methods*, 9, 676-  
82.

SCHNEIDER, C. A., RASBAND, W. S. & ELICEIRI, K. W. 2012. NIH Image to ImageJ: 25 years  
of image analysis. *Nat Methods*, 9, 671-5.

SONG, L., HOBAUGH, M. R., SHUSTAK, C., CHELEY, S., BAYLEY, H. & GOUAUX, J. E.  
1996. Structure of staphylococcal alpha-hemolysin, a heptameric transmembrane pore.  
*Science*, 274, 1859-66.

SUBBURAJ, Y., COSENTINO, K., AXMANN, M., PEDRUEZA-VILLALMANZO, E.,  
HERMANN, E., BLEICKEN, S., SPATZ, J. & GARCIA-SAEZ, A. J. 2015. Bax monomers  
form dimer units in the membrane that further self-assemble into multiple oligomeric  
species. *Nat Commun*, 6, 8042.

- SUNG, T. C., LI, C. Y., LAI, Y. C., HUNG, C. L., SHIH, O., YEH, Y. Q., JENG, U. S. & CHIANG, Y. W. 2015. Solution Structure of Apoptotic BAX Oligomer: Oligomerization Likely Precedes Membrane Insertion. *Structure*, 23, 1878-88.
- SUZUKI, M., YOULE, R. J. & TJANDRA, N. 2000. Structure of Bax: coregulation of dimer formation and intracellular localization. *Cell*, 103, 645-654.
- TERRONES, O., ANTONSSON, B., YAMAGUCHI, H., WANG, H. G., LIU, J., LEE, R. M., HERRMANN, A. & BASANEZ, G. 2004. Lipidic pore formation by the concerted action of proapoptotic BAX and tBID. *J Biol Chem*, 279, 30081-30091.
- TRAN, V. H., BARTOLO, R., WESTPHAL, D., ALSOP, A., DEWSON, G. & KLUCK, R. M. 2013. Bak apoptotic function is not directly regulated by phosphorylation. *Cell Death Dis*, 4, e452.
- WEBER, K., HARPER, N., SCHWABE, J. & COHEN, G. M. 2013. BIM-mediated membrane insertion of the BAK pore domain is an essential requirement for apoptosis. *Cell Rep*, 5, 409-20.
- WEI, M. C., ZONG, W. X., CHENG, E. H., LINDSTEN, T., PANOUTSAKOPOULOU, V., ROSS, A. J., ROTH, K. A., MACGREGOR, G. R., THOMPSON, C. B. & KORSMEYER, S. J. 2001. Proapoptotic BAX and BAK: a requisite gateway to mitochondrial dysfunction and death. *Science*, 292, 727-730.
- WESTPHAL, D., DEWSON, G., MENARD, M., FREDERICK, P., IYER, S., BARTOLO, R., GIBSON, L., CZABOTAR, P. E., SMITH, B. J., ADAMS, J. M. & KLUCK, R. M. 2014. Apoptotic pore formation is associated with in-plane insertion of Bak or Bax central helices into the mitochondrial outer membrane. *Proc Natl Acad Sci U S A*, 111, E4076-85.
- WOLTER, K. G., HSU, Y. T., SMITH, C. L., NECHUSHTAN, A., XI, X. G. & YOULE, R. J. 1997. Movement of Bax from the cytosol to mitochondria during apoptosis. *Journal of Cell Biology*, 139, 1281-1292.
- ZHANG, Z., SUBRAMANIAM, S., KALE, J., LIAO, C., HUANG, B., BRAHMBHATT, H., CONDON, S. G., LAPOLLA, S. M., HAYS, F. A., DING, J., HE, F., ZHANG, X. C., LI, J., SENES, A., ANDREWS, D. W. & LIN, J. 2016. BH3-in-groove dimerization initiates and helix 9 dimerization expands Bax pore assembly in membranes. *EMBO J*, 35, 208-36.
- ZHANG, Z., ZHU, W., LAPOLLA, S. M., MIAO, Y., SHAO, Y., FALCONE, M., BOREHAM, D., MCFARLANE, N., DING, J., JOHNSON, A. E., ZHANG, X. C., ANDREWS, D. W. & LIN, J. 2010. Bax forms an oligomer via separate, yet interdependent, surfaces. *J Biol Chem*, 285, 17614-17627.
- ZHOU, L. & CHANG, D. C. 2008. Dynamics and structure of the Bax-Bak complex responsible for releasing mitochondrial proteins during apoptosis. *J Cell Sci*, 121, 2186-96.



Figure 1

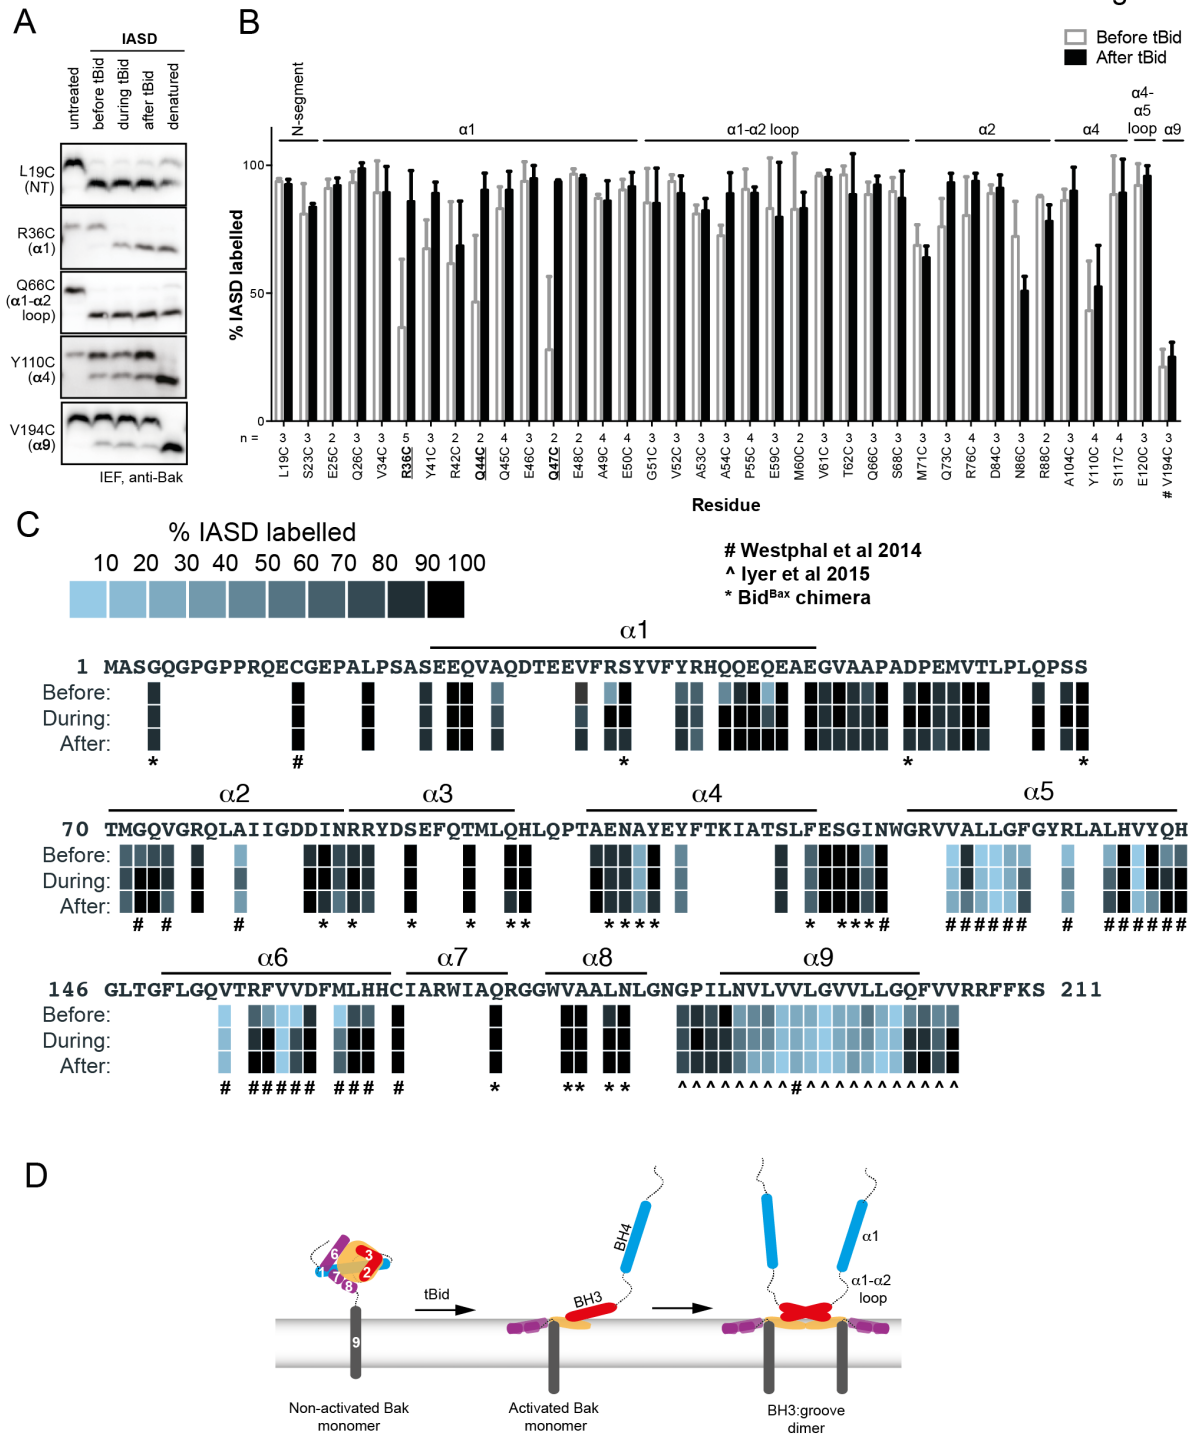

773

774

775 **Figure 1** Following oligomerization, the Bak N-segment,  $\alpha 1$  and  $\alpha 1$ - $\alpha 2$  loop become fully solvent-  
776 exposed in contrast to the partially exposed core ( $\alpha 2$ - $\alpha 5$ ) and latch ( $\alpha 6$ - $\alpha 9$ ).

777 (A) Solvent exposure of hBak cysteine mutants was assessed by IASD labelling before (lane 2),  
778 during (lane 3) and after (lane 4) treatment with tBid. Controls of unlabelled (untreated, lane 1) and  
779 fully labelled (denatured, lane 5) Bak were included for comparison. Example IEF western blots are  
780 shown.

781 (B) Quantitation of IASD labelling before and after treatment with tBid for the panel of previously  
782 untested Bak residues. Data are mean  $\pm$  SD ( $n \geq 3$ ), or range ( $n=2$ ), with  $n$  for each residue labelled  
783 on the x-axis. IASD labelling data for residue V194C were from (Westphal et al., 2014) (denoted  
784 #). Residues for which there is a significant difference in IASD labelling before versus after tBid  
785 are in bold and underlined ( $p < 0.05$ ).

786 (C) Heat map overview of Bak IASD labelling with tBid treatment from (B) pooled with published  
787 analyses from (Westphal et al., 2014)(denoted #) or (Iyer et al., 2015)(denoted ^) and from  
788 treatment with the tBid<sup>Bax</sup> chimera (denoted \*; see also Figure S2).

789 (D) Schematic of Bak structural rearrangement from its non-activated monomeric state to the  
790 activated dimer. Helices are numbered for the non-activated Bak. Note the complete solvent-  
791 exposure of  $\alpha 1$  and the  $\alpha 1$ - $\alpha 2$  loop in the activated dimer.

792

Figure 2

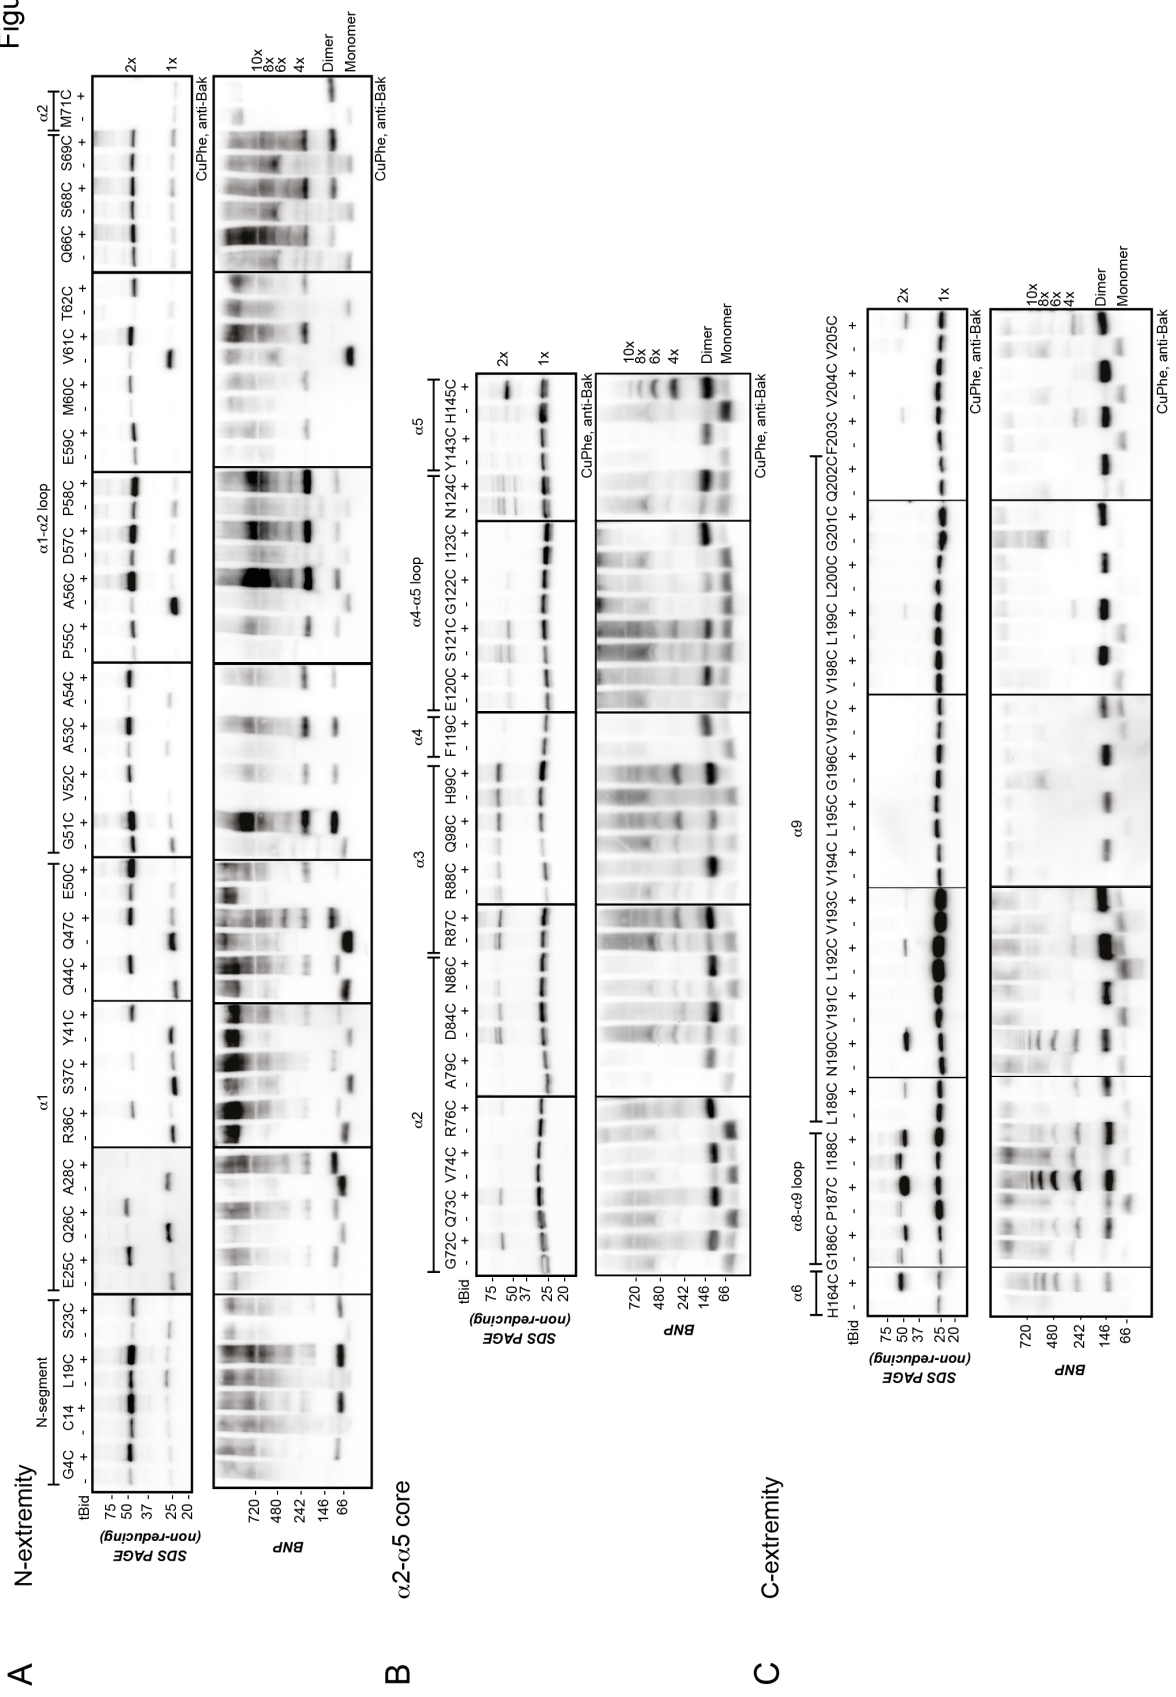

797 **Figure 2** The N- and C-extremities of oligomerized Bak are mobile relative to the  $\alpha 2$ - $\alpha 5$  core  
 798 dimer. Mitochondrial fractions from cells expressing the indicated Bak cysteine mutants were  
 799 incubated with tBid to oligomerize Bak, and oxidant (CuPhe) added to induce disulphide bonds.  
 800 Aliquots were analyzed by non-reducing SDS PAGE (upper panels) and BNP (lower panels), and  
 801 immunoblotted for Bak to detect linked species.

802 (A) Cysteine linkage occurs throughout the N-extremity.

803 (B) Cysteine linkage occurs, but is less complete, in the  $\alpha 2$ - $\alpha 5$  dimer core.

804 (C) Cysteine linkage occurs in the C-extremity. (See also  $\alpha 6$ : $\alpha 6$  linkage in (Dewson et al., 2008)  
 805 and  $\alpha 9$ : $\alpha 9$  linkage in (Iyer et al., 2015)).

806

807

Figure 3

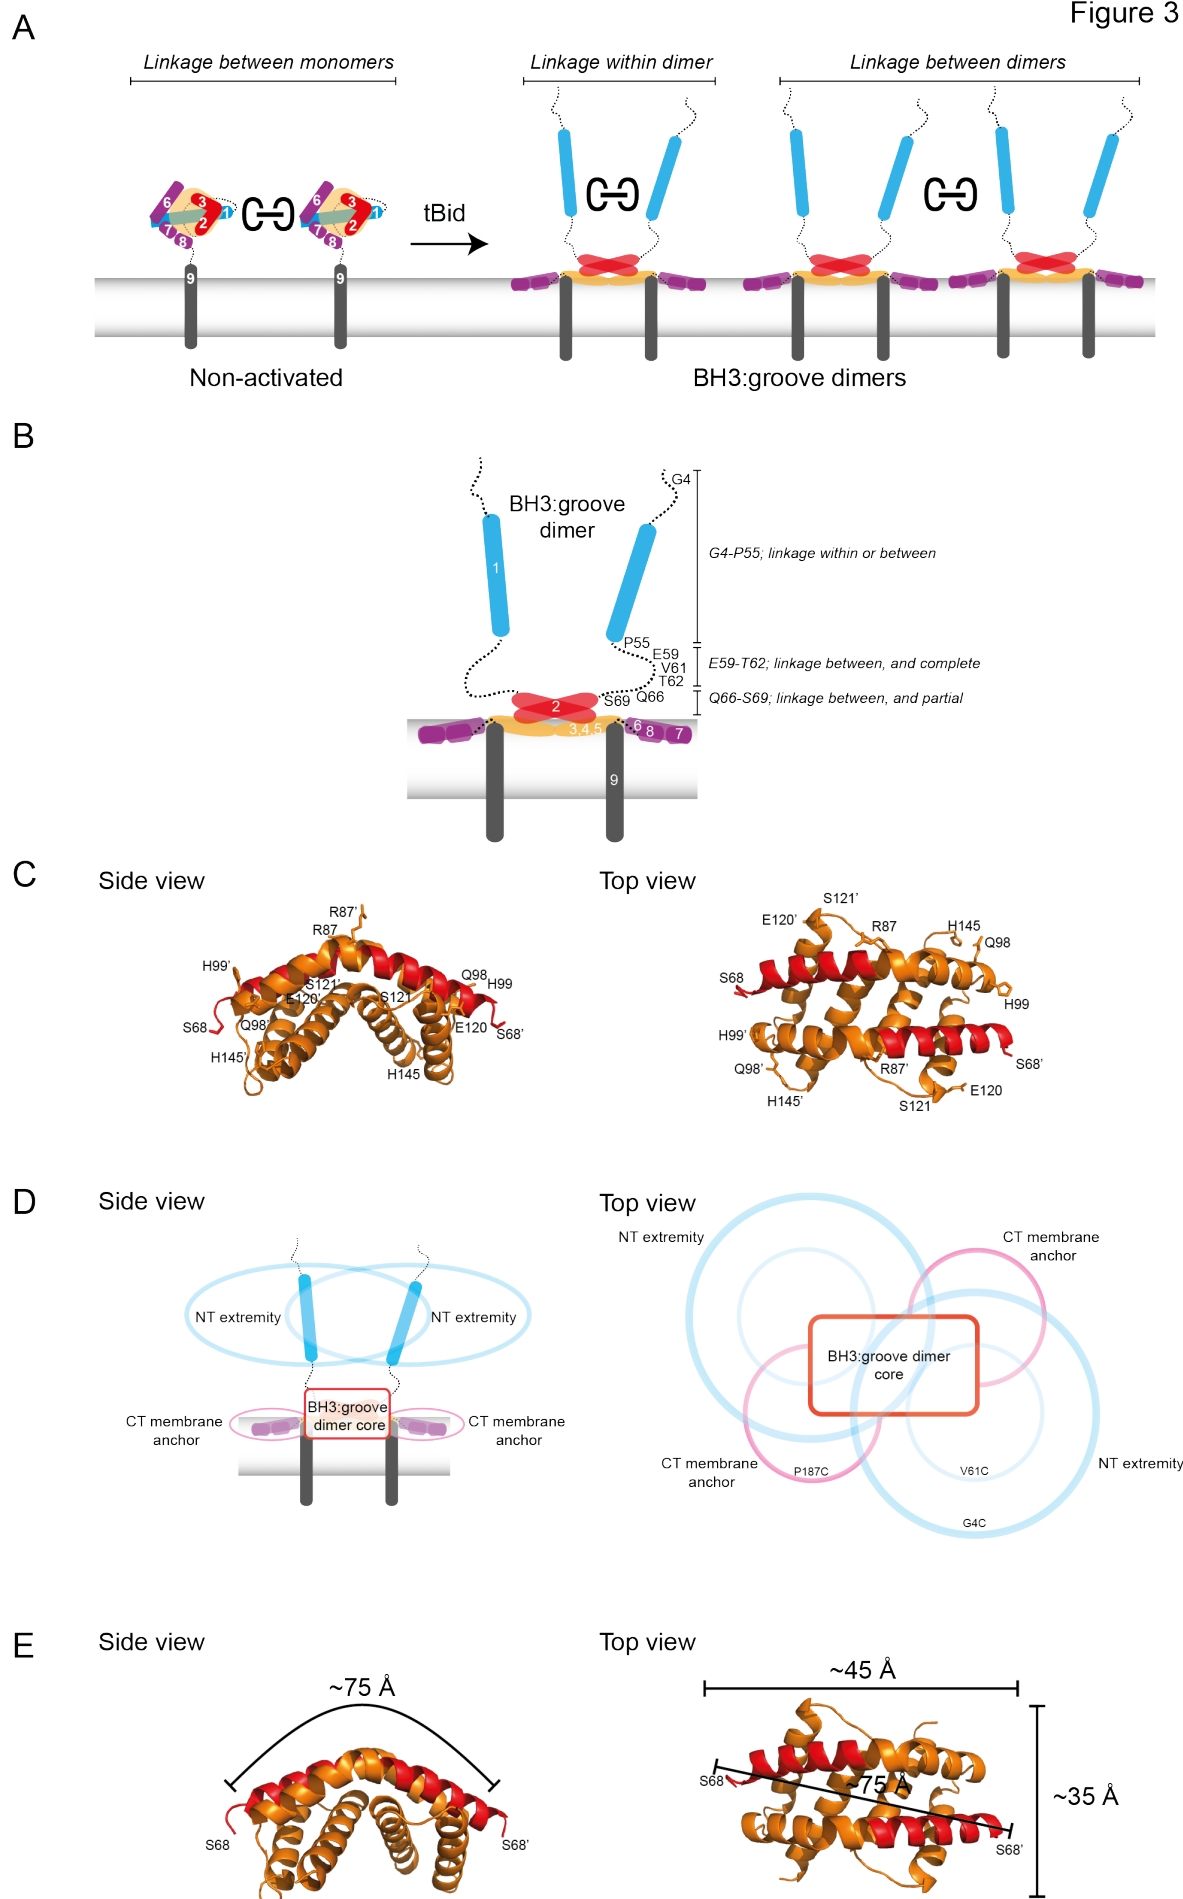

809 **Figure 3** Linkage constraints for different regions of the active Bak dimer support a flexible  
810 extremity model for full-length Bak dimers in the MOM.

811 (A) The oxidant CuPhe induces linkage *between* Bak monomers or dimers, or *within* Bak dimers.  
812 Correlation of BNP with non-reducing SDS PAGE can differentiate linkage within and between  
813 dimers.

814 (B) Summary of linkage outcomes within or between dimers for residues in the Bak dimer N-  
815 extremity.

816 (C) Linkage at the lateral corners of the Bak  $\alpha 2$ - $\alpha 5$  core dimer is highlighted with residue labels and  
817 sticks on the crystal structure (4U2V (Brouwer et al., 2014)).

818 (D) Schematic of the activated Bak dimer at the membrane in side and top views. The range of  
819 movement of the N- and C-extremities is indicated with coloured ovals (blue and pink respectively).

820 (E) Our linkage data are consistent with the dimensions of the Bak core dimer. The dimensions of  
821 the Bak  $\alpha 2$ - $\alpha 5$  core dimer 4U2V (Brouwer et al., 2014) are shown in side view and top view. In the  
822 crystal structure, the distance from one edge of the core at S68 over the bended structure of the  
823 symmetric core to the opposing S68' is  $\sim 75$  Å. Thus, for residues in the mobile N-extremity to link  
824 within the core dimer, the two homotypic cysteine residues must bridge a distance of  $\sim 75$  Å. This is  
825 not feasible for the residue V61C which is  $\sim 30$  Å from the symmetric core.

826

827

A

Figure 4

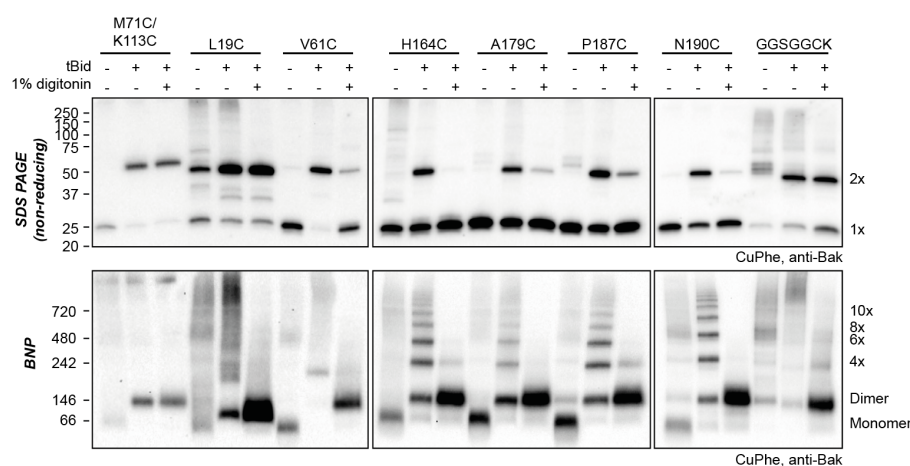

B

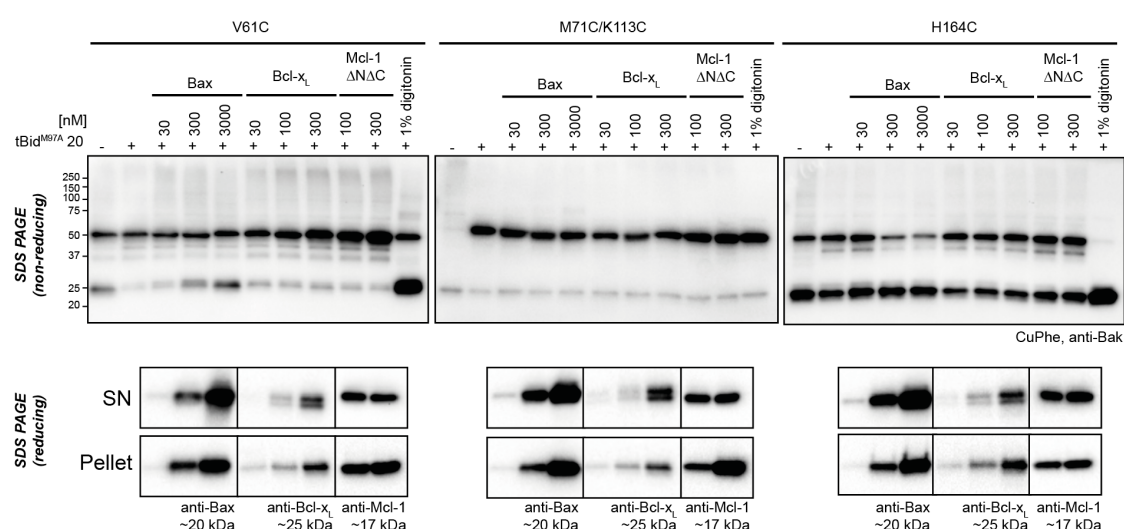

**Figure 4** Bak dimer-dimer interactions are disrupted by detergent or Bax.

(A) Digitonin prevents linkage between Bak dimers. Membrane fractions expressing the indicated Bak single-cysteine variants were first treated with tBid, and then supplemented, as indicated, with detergent (1% digitonin) prior to cysteine linkage. Two additional mutants were included to show linkage within dimers at the BH3:groove interface (M71C/K113C) and at extensions to the C-terminus (GGSGGCK).

(B) Bax can disrupt Bak dimer-dimer association. Membrane fractions first treated with tBid<sup>M97A</sup> were then incubated, as indicated, with Bax, Bcl-x<sub>L</sub>, Mcl-1ΔN151ΔC23 or digitonin prior to cysteine linkage (upper panels). Supernatant and pellet fractions showed partial translocation of each recombinant protein to the membrane fraction (lower panels).



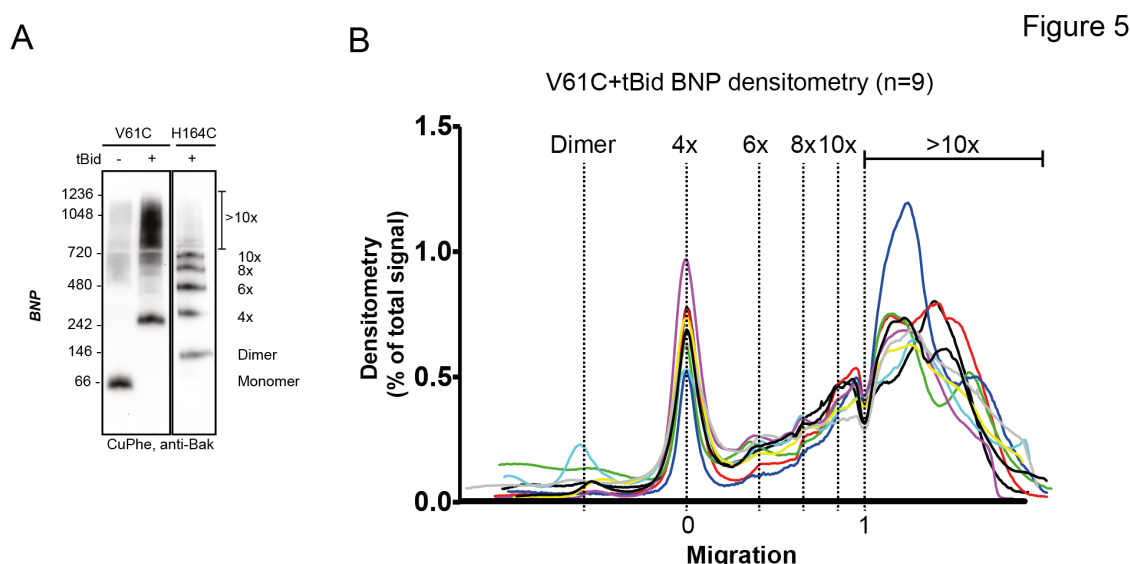

Figure 5

**Figure 5** V61C:V61C' linkage is a marker of dimer-dimer interaction.

(A) BNP analysis of V61C:V61C' linkage revealed no dimers, and a high proportion of 4x and >10x species. In contrast, H164C:H164C' linkage revealed a ladder of linked species.

(B) Densitometry of V61C:V61C' BNP linkage in Bak oligomers shows negligible dimers but reproducible linked species at 4x, 6x, 8x, and 10x, and a large population of species >10x. Densitometry data (n=9) were normalised to the area under the curve after alignment as described in Experimental Procedures. To correct for small variations in electrophoretic migration, we employed a noise reduction algorithm in which the 4x peak (0) and a minima at ~720 kDa (1) were aligned between replicates.

Figure 6

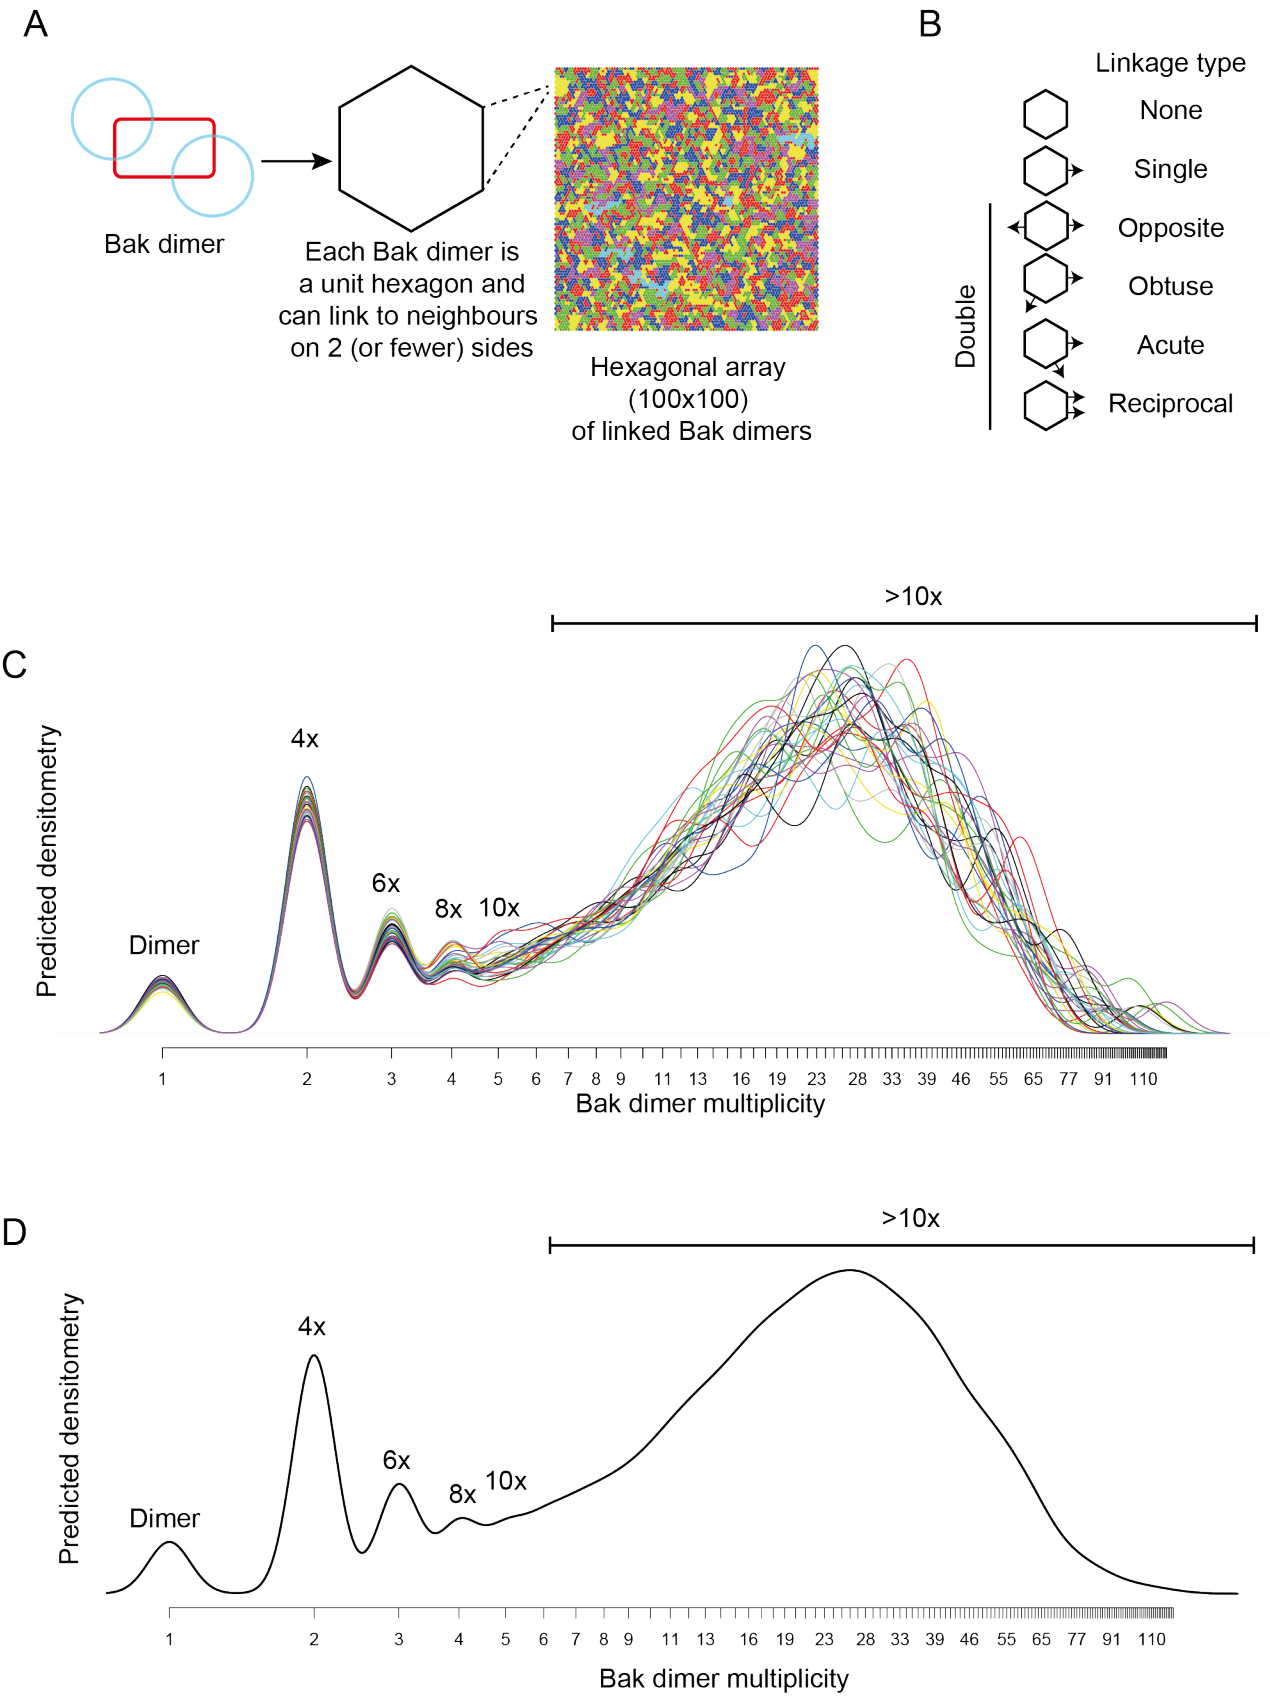

853  
854  
855

856 **Figure 6** Bak dimer arrangement examined by two-dimensional stochastic simulations: a random  
857 arrangement is the best fit for the V61C:V61C' BNP linkage densitometry.

858 (A) A grid of 100x100 was designated for the 2D simulations. Each unit hexagon within that grid  
859 represented a Bak dimer, with the capacity to link to 2 neighbouring hexagons. The direction of  
860 linkage from each hexagon was randomised. An example visual output from a 100x100 hexagonal  
861 array is shown: neighbouring subsets of linked Bak dimers within the grid are delineated by  
862 different colours.

863 (B) Linkage possibilities between each dimer unit in a hexagonal 2D array.

864 (C,D) Overlay (C), and average (D) of 30 predicted densitometry plots.

865

866

Figure 7

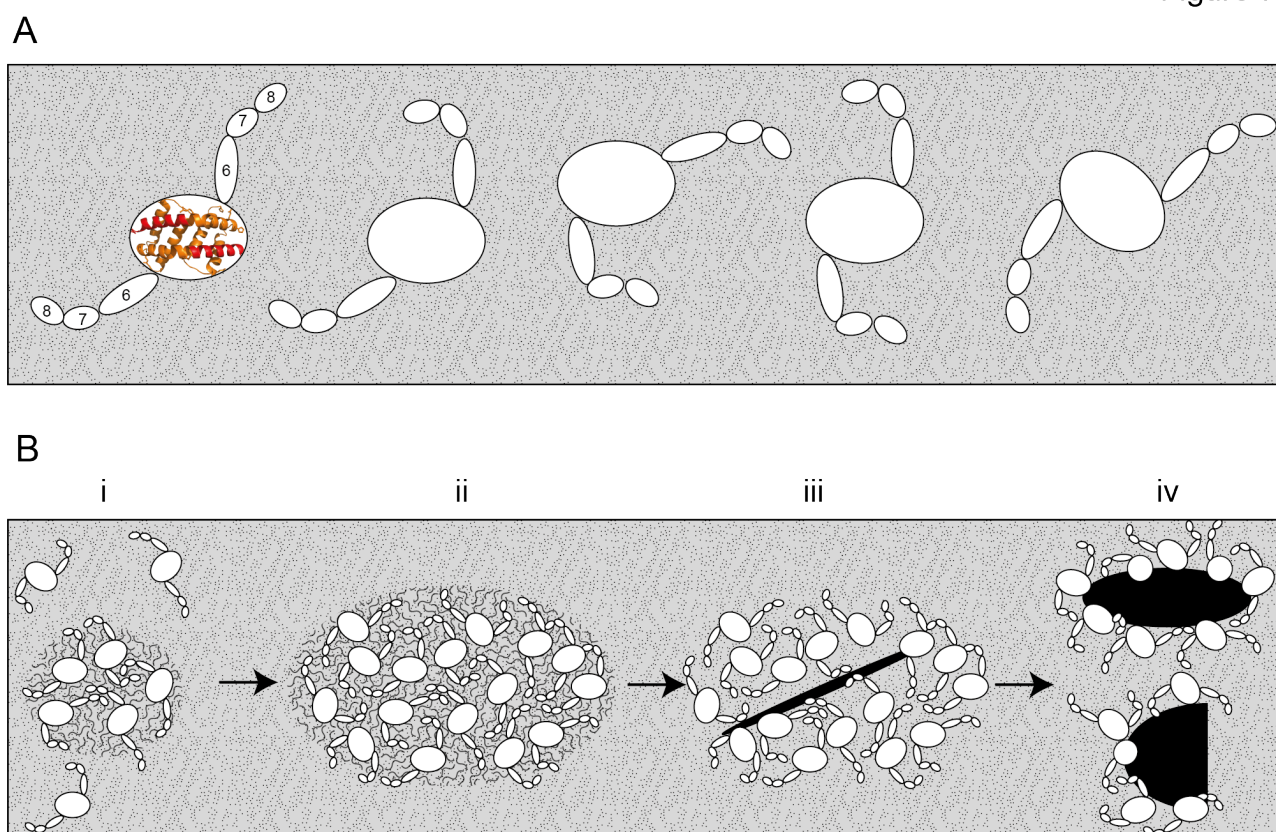

**Figure 7** Bak dimers adopt various conformations on the membrane surface and aggregate in compact, disordered clusters to disrupt the mitochondrial outer membrane.

(A) The top view of Bak dimers lying in-plane on the mitochondrial surface. The  $\alpha 2$ - $\alpha 5$  core is bounded by the large oval. Extending from the core are the membrane anchored C-terminal helices  $\alpha 6$ ,  $\alpha 7$  and  $\alpha 8$ . For simplicity, the  $\alpha 9$  transmembrane domains that project into the membrane plane, and the flexible, solvent exposed N-termini of each dimer are not shown.

(B) Growing clusters of Bak dimers induce membrane tension to rupture mitochondria.

(i) Upon activation, Bak dimers penetrate the outer leaflet of the membrane and accumulate in a compact, irregular cluster.

(ii) More dimers converge on the cluster, thus enlarging the patch of membrane disturbance.

(iii) Once the patch attains a critical area, a non-lamellar lipidic arrangement is generated, relieving membrane tension.

(iv) Lipids and Bak dimers rearrange to bury exposed hydrophobic surfaces, yielding a variety of proteolipid (toroidal) “pores”. Our assays survey a mixture of Bak linkage products derived from stages (ii), (iii) and (iv).

884 SUPPLEMENTAL INFORMATION

Figure S1

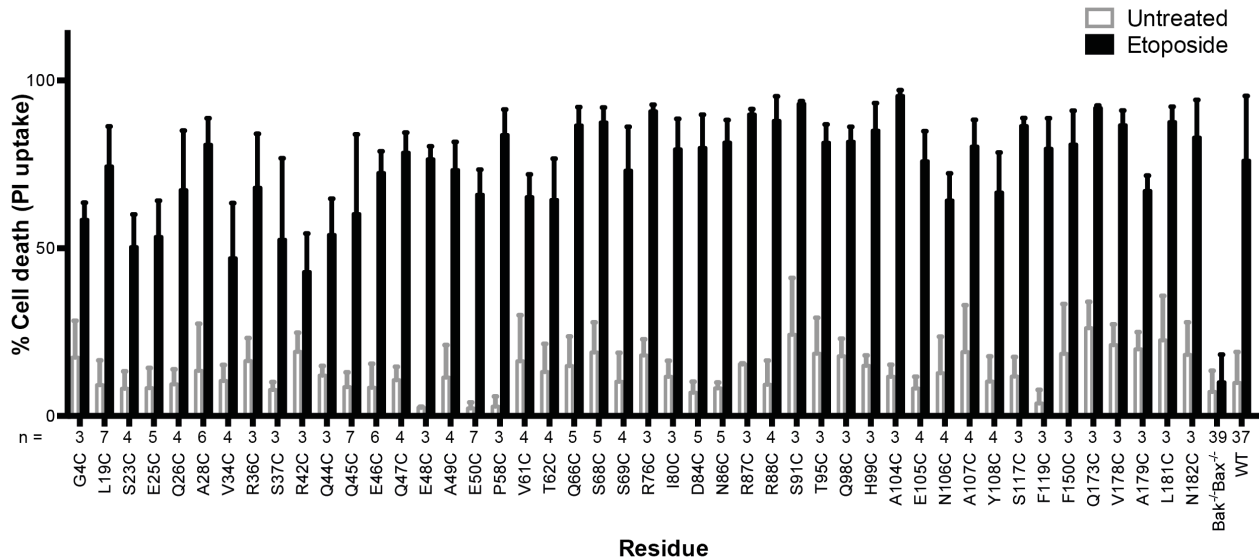

885

886 **Figure S1** Bak cysteine variants retain apoptotic function. *Bak<sup>-/-</sup>Bax<sup>-/-</sup>* MEF expressing Bak cysteine  
887 variants were treated with 10  $\mu$ M etosiposide for 24 h and the percentage cell death quantified by  
888 propidium iodide uptake. Data are for unpublished mutants only and are the mean  $\pm$  SD. The  
889 number of replicates (n) for each residue is labelled on the x-axis.

Figure S2

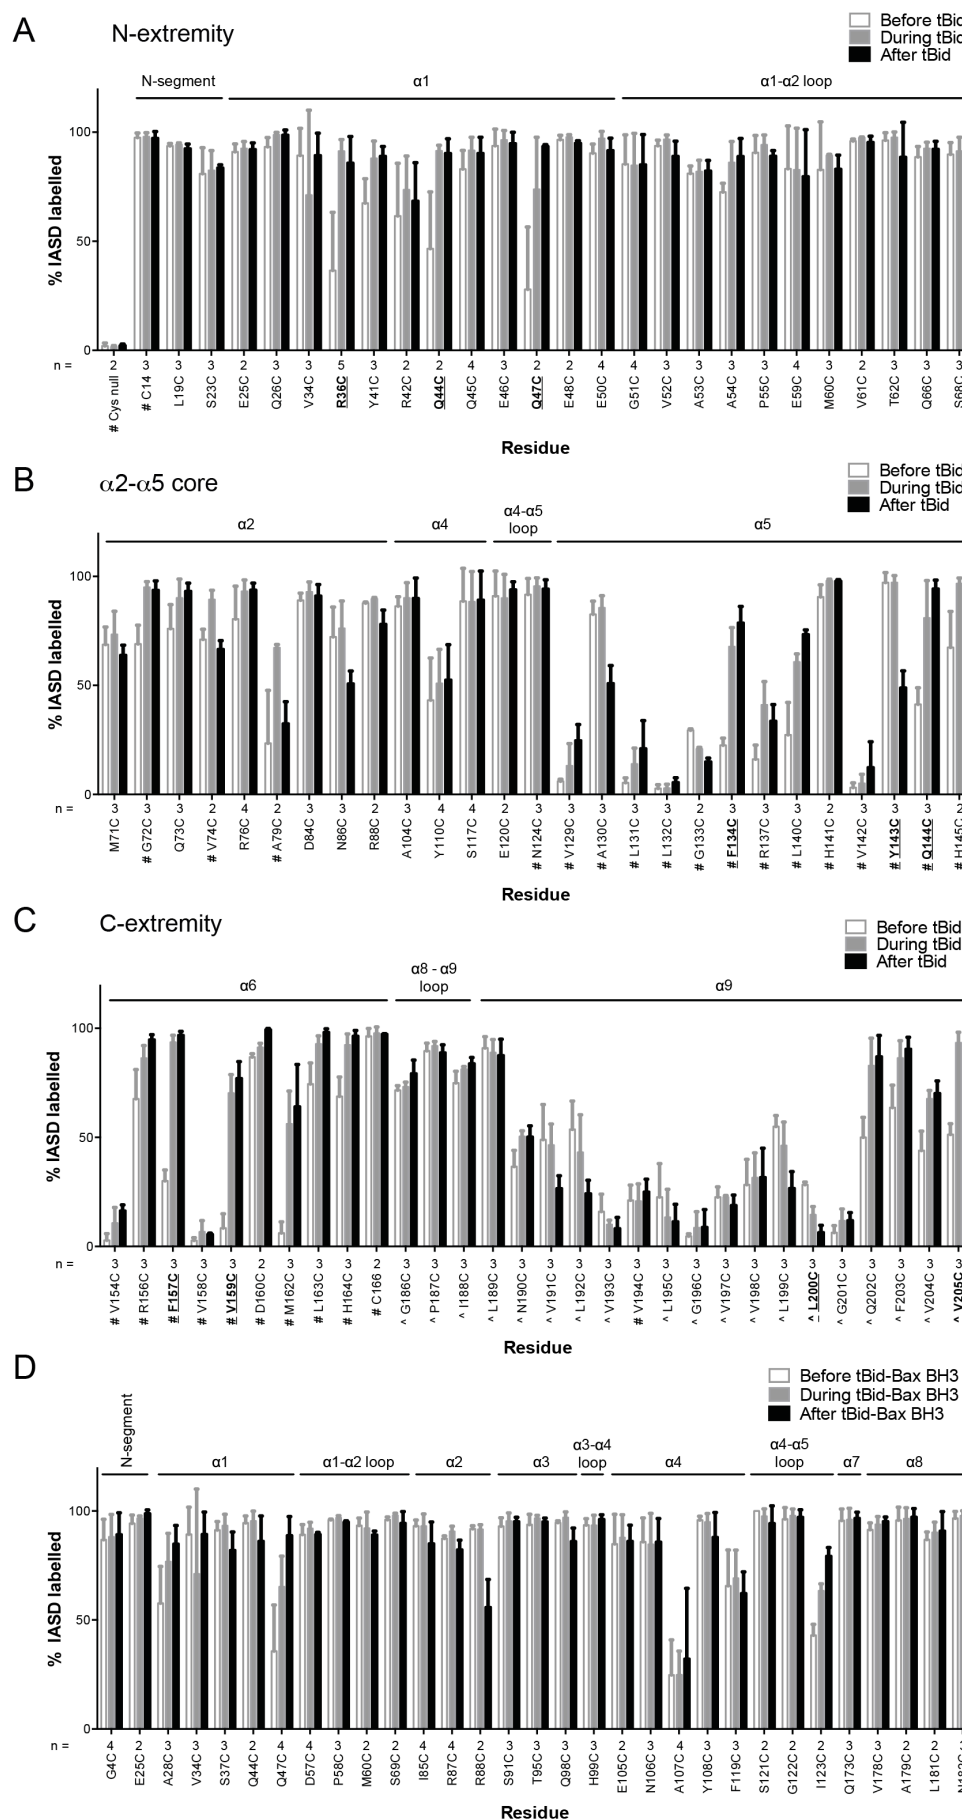

890

891

892 **Figure S2** Quantitation of Bak IASD labelling before, during and after Bak activation.

893 (A,B,C). Labelling before, during or after treatment with tBid, segregated by Bak N-extremity (A),  
 894 Core (B), and C-extremity (C). Previously untested Bak residues have been pooled with data from  
 895 previous studies (# denotes data from (Westphal et al., 2014), ^ denotes data from (Iyer et al.,  
 896 2015)). Data are mean  $\pm$  SD, or range (n=2), with n for each residue labelled on the x-axis.  
 897 Residues for which there is a significant difference in IASD labelling before versus after tBid are in  
 898 bold and underlined ( $p < 0.05$ ).

899 (D) IASD labelling for selected Bak variants before, during and after treatment with tBid<sup>Bax</sup>  
 900 chimera (Hockings et al., 2015). Data are mean  $\pm$  SD ( $n \geq 3$ ), or range (n=2), with n for each  
 901 residue labelled on the x-axis. No significant differences ( $p$  value cutoff of 0.05) in IASD labelling  
 902 before versus after tBid<sup>Bax</sup> were observed.

903

904



905

Figure S3

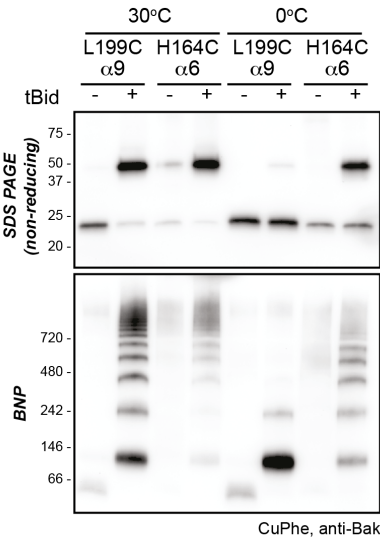

906

907 **Figure S3** Higher temperature enhances disulphide bonding of cysteine residues in  $\alpha 6$  (H164C) and  
908 the  $\alpha 9$  transmembrane domain (L199C). Mitochondrial fractions from cells expressing the indicated  
909 Bak cysteine mutants were incubated with tBid to oligomerize Bak, and oxidant (CuPhe) added to  
910 induce disulphide bonds. Samples were incubated with CuPhe for 15 min either at 0°C or at 30°C.  
911 Aliquots were analyzed by non-reducing SDS PAGE (upper) and BNP (lower), and immunoblotted  
912 for Bak to detect linked species. Note that linkage outside the membrane (H164C:H164C') was  
913 efficient even at 0°C.

914

915

Figure S4

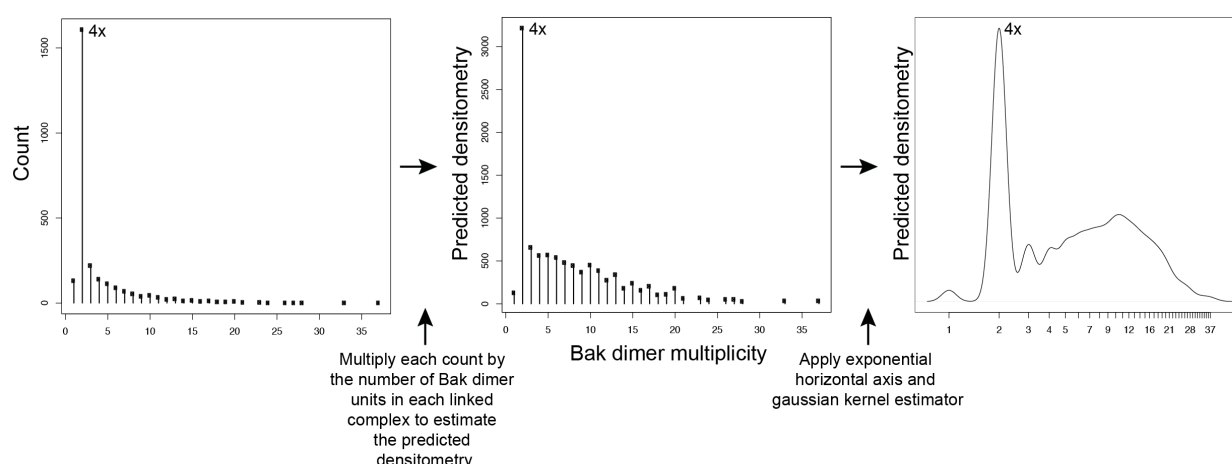

916

917 **Figure S4** Adjustment to simulation output to allow qualitative comparison to western blot data.  
 918 Mathematical simulations of Bak dimer linkage generated frequency distributions of the size of Bak  
 919 complexes (multiples of Bak dimers). These frequency distributions were then transformed to a  
 920 predicted densitometry by multiplying each count by the number of Bak dimer units present in each  
 921 linked Bak complex. For instance, the count representing 2x complexes, is multiplied by 1, the  
 922 count representing 4x complexes is multiplied by 2, the count representing 6x complexes is  
 923 multiplied by 3, etc. This predicted densitometry approximates the total relative abundance of Bak  
 924 molecules in each linked Bak complex, which was then transformed with an exponential horizontal  
 925 axis to mimic the nonlinear spacing of bands, and a gaussian kernel estimator to approximate the  
 926 smearing of bands (especially at higher molecular weights) to allow qualitative comparison to  
 927 western blot densitometry outputs.

928

Figure S5

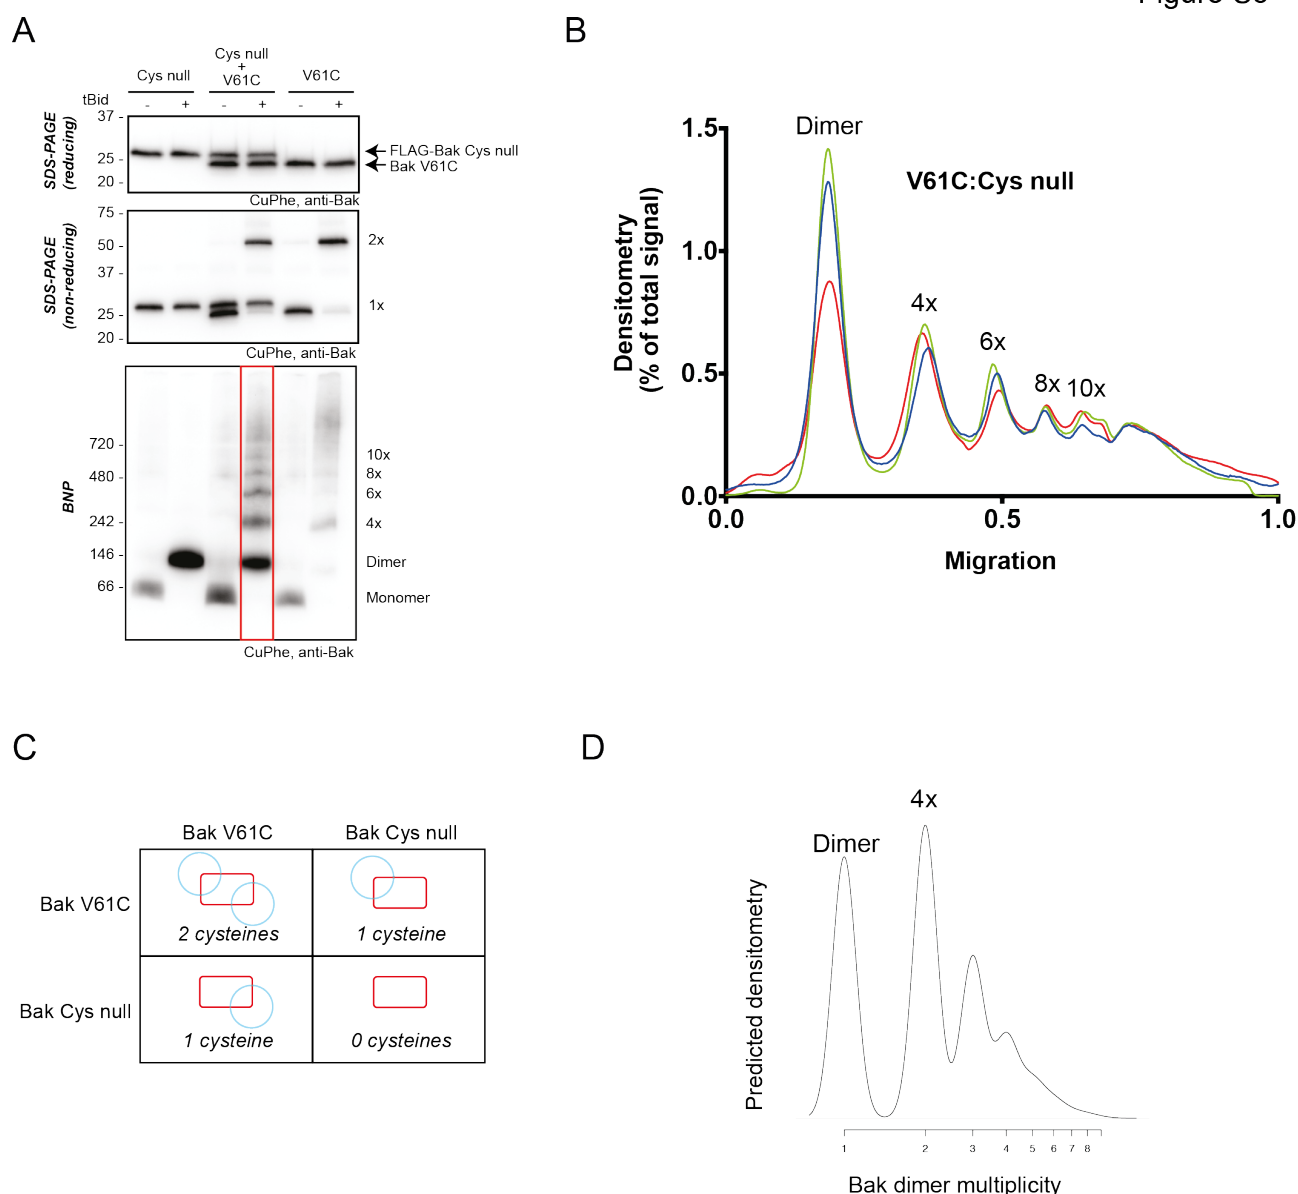

**Figure S5** 2D simulation with reduced efficiency linkage successfully models reduced linkage in mitochondrial experiments.

(A) Co-expression of Bak V61C with Bak Cys null resulted in less high order linkage species on BNP. Membrane fractions expressing Bak V61C, FLAG-Cys null, or both, were incubated with or without tBid, and then subjected to CuPhe linkage and analysis by BNP, non-reducing SDS PAGE or reducing SDS PAGE.

(B) Densitometry of BNP linkage data following tBid treatment for 3 replicates of the V61C:Flag-Cys null co-expression. Data are normalised to the area under the curve.

(C) Diagram showing the four types of dimers that would form upon co-expression of V61C and Cys null variants of Bak (i.e. a system in which 50 % of Bak molecules are unable to link). Note that dimers will be capable of 0, 1 or 2 linkages.

(D) The 2D simulation was altered to incorporate 50% linkage-incompetent Bak molecules. This simulation yielded a good concordance with the V61C:Flag Cys null densitometry.

Figure S6

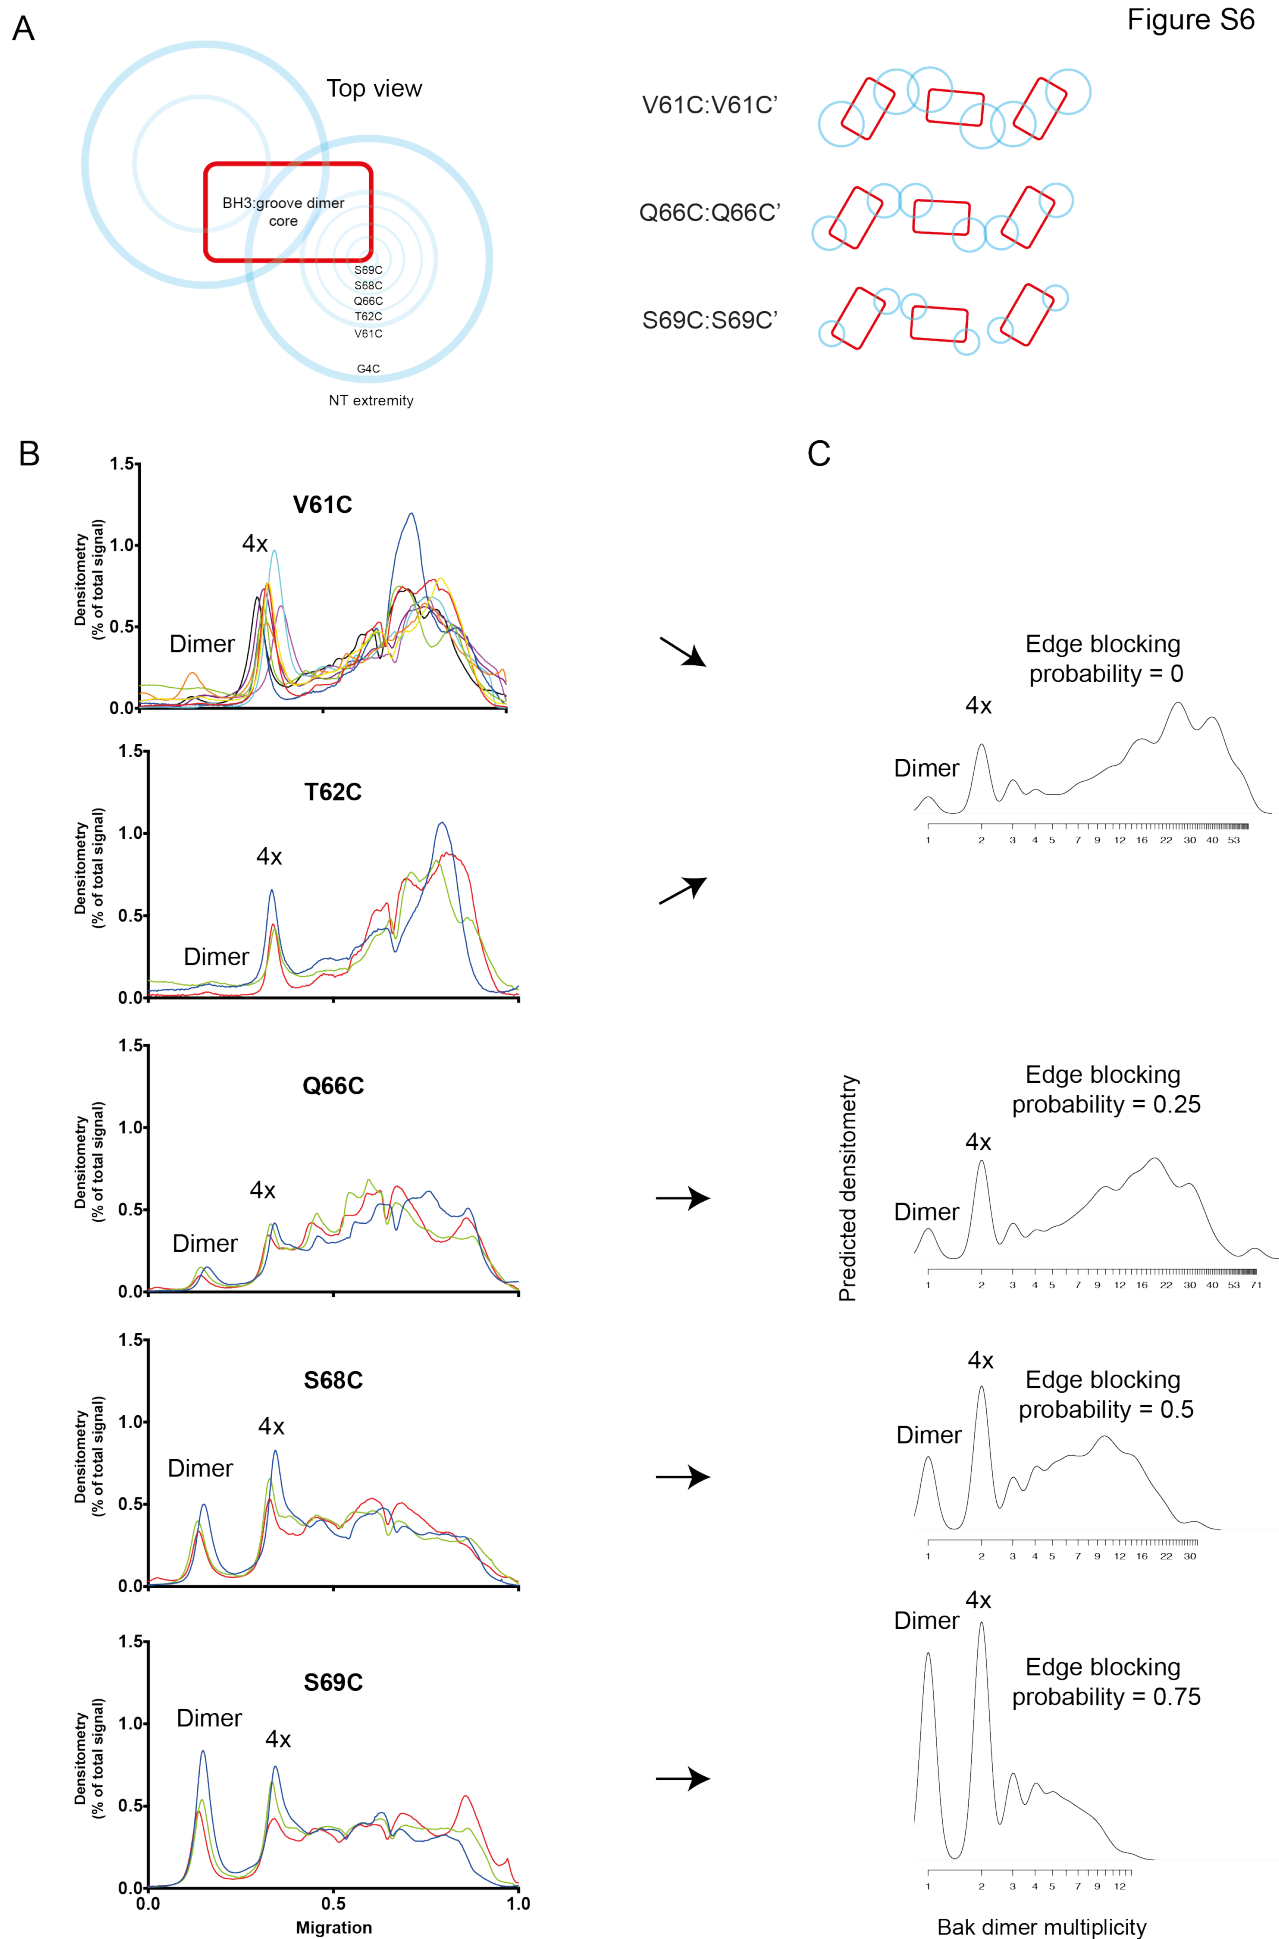

944 **Figure S6** 2D simulation with edge blocking probability successfully models mitochondrial  
 945 experiments in which Bak linkage becomes constrained as cysteines are positioned closer to the  
 946 dimer core.

947 (A) Residues between V61C and the core of the Bak dimer have a progressively more limited range  
 948 of movement. On the left, blue circles are shown on a schematic of the Bak dimer to represent the  
 949 range of movement for G4C, V61C, T62C, Q66C, S68C and S69C. On the right, an illustration of  
 950 the reduced overlap of Bak dimer extremities (blue circles) is shown for residues with progressively  
 951 smaller ranges of movement (e.g. V61C>Q66C>S69C).

952 (B) Densitometry of BNP outputs from V61C, T62C, Q66C, S68C and S69C highlight the reduced  
 953 linkage efficiency (relative to V61C) as cysteine substitutions approach the constrained core of the  
 954 Bak dimer.

955 (C) The 2D simulation was altered to incorporate an “edge blocking probability” to mimic the  
 956 increasing linkage constraint experienced by cysteine substitutions as they approached the core. The  
 957 best approximation of each cysteine substitution mutant is indicated by arrows.
